# Supplementary material for: Disease-Associated Mutations Disrupt Functionally Important Regions of Intrinsic Protein Disorder
Source: PLoS Comput Biol. 2012 Oct 4;8(10):e1002709. doi: 10.1371/journal.pcbi.1002709 (PMC3464192; doi:10.1371/journal.pcbi.1002709)
Supplement: Table S1 — Disease mutations have higher frequencies in ordered regions independently of the choice of predictor (VLXT, VSL3B, and IUPred). (XLS) [file pcbi.1002709.s009.xls]

## Sheet: Sheet1
				IDR mutations		OR mutations
Predictor	Dataset	Proteins	Total mutations	n	%	n	%	Fold
VLXT	DM	2194	15459	3356	21.709	12103	78.291	-
	Poly	8489	24220	9790	40.4211	14430	59.5789	0.537071
	NES	1998	60299	26927	44.6558	33372	55.3442	0.486141
VSL2B	DM	2194	15459	3617	23.3974	11842	76.6026	-
	Poly	8489	24220	12169	50.2436	12051	49.7564	0.465679
	NES	1998	60039	33109	55.1458	26930	44.8542	0.424282
IUPRED	DM	2194	15459	1561	10.0977	13898	89.9023	-
	Poly	8489	24220	7346	30.3303	16874	69.6697	0.332924
	NES	1998	60299	20707	34.3405	39592	65.6595	0.294045
