# Supplementary material for: Disease-Associated Mutations Disrupt Functionally Important Regions of Intrinsic Protein Disorder
Source: PLoS Comput Biol. 2012 Oct 4;8(10):e1002709. doi: 10.1371/journal.pcbi.1002709 (PMC3464192; doi:10.1371/journal.pcbi.1002709)
Supplement: Table S3 — Disorder-to-order transition mutations are significantly enriched in DM independently of the choice of predictor. Order-to-disorder transition mutations are significantly depleted in disease when compared to NES but not when compared to Poly (after multiple testing correction). P-values were computed using Fisher's exact test. (XLS) [file pcbi.1002709.s011.xls]

## Sheet: Sheet1
		D → O		D → D				O → D		O → O
Predictor	Dataset	n	%	n	%	Fold	P-value	n	%	n	%	Fold	P-value
VLXT	DM	670	19.9642	2686	80.0358	-	-	590	4.87482	11513	95.1252	-	-
	Poly	1125	11.4913	8665	88.5087	1.73733	1.05708e-32	710	4.9203	13720	95.0797	0.990757	0.8865
	NES	1971	7.31979	24956	92.6802	2.72743	5.47e-105	1870	5.6035	31502	94.3965	0.869961	0.0023
VSL2B	DM	541	14.9571	3076	85.0429	-	-	596	5.03293	11246	94.9671	-	-
	Poly	887	7.28901	11282	92.711	2.05201	8.38929e-41	636	5.27757	11415	94.7224	0.953646	0.3963
	NES	1840	5.5574	31269	94.4426	2.69139	2.26866e-82	1786	6.63201	25144	93.368	0.758885	8.42567e-10
IUPRED	DM	227	14.542	1334	85.458	-	-	226	1.62613	13672	98.3739	-	-
	Poly	500	6.80643	6846	93.1936	2.1365	3.31131e-21	339	2.00901	16535	97.991	0.809421	0.0133
	NES	1003	4.84377	19704	95.1562	3.0022	1.57885e-43	974	2.46009	38618	97.5399	0.661005	4.245e-09
