# Supplementary material for: Disease-Associated Mutations Disrupt Functionally Important Regions of Intrinsic Protein Disorder
Source: PLoS Comput Biol. 2012 Oct 4;8(10):e1002709. doi: 10.1371/journal.pcbi.1002709 (PMC3464192; doi:10.1371/journal.pcbi.1002709)
Supplement: Table S7 — Fold difference for Swiss Prot FT Level 1 features between DM and Poly (first two rows), and DM and NES (last three rows) for D→O and O→D transitions. Only features with Bonferroni-corrected P-values<0.05 in either D→O or O→D were included. (XLS) [file pcbi.1002709.s015.xls]

## Sheet: Sheet1
		D → O			O → D
Datasets	Level 1 Feature	Fold	95% CI	Corrected P	Fold	95% CI	Corrected P
DM / Poly	DNA binding	10.91	[3.83, 31.14]	1.3e-06	4.21	[0.88, 20.20]	n/s
	Disulfit bond	3.49	[1.81, 6.71]	0.0052	3.27	[1.38, 7.72]	n/s
DM / NES	Disulfit bond	7.94	[3.87, 16.32]	6.4e-08	6.69	[3.04, 14.71]	4.8e-05
	DNA binding	76.53	[10.42, 562.09]	1.1e-14	22.2	[2.78, 177.12]	0.0022
	PTM site	5.04	[1.99, 12.76]	0.027	3.17	[0.45, 22.45]	n/s
