# Supplementary material for: Disease-Associated Mutations Disrupt Functionally Important Regions of Intrinsic Protein Disorder
Source: PLoS Comput Biol. 2012 Oct 4;8(10):e1002709. doi: 10.1371/journal.pcbi.1002709 (PMC3464192; doi:10.1371/journal.pcbi.1002709)
Supplement: Table S9 — PolyPhen-2 and SIFT calls for all mutations in DM, Poly and NES show a drop in sensitivity for calling disease-associated mutations in IDRs (bold font in row DM IDR) and a drop in specificity for D→O (bold font in rows Poly D→O and NES D→O). (XLS) [file pcbi.1002709.s017.xls]

## Sheet: Sheet1
		PolyPhen-2				SIFT
		probably damaging	possibly damaging	benign	unknown	damaging	tolerated
DM	all	71.7984	11.7866	14.5649	1.85004	72.1857	27.8143
	OR	74.8663	11.0378	12.9428	1.15307	74.39	25.61
	O→O	74.7408	11.1228	13.003	1.13337	74.2904	25.7096
	O→D	77.3038	9.38567	11.7747	1.53584	76.3251	23.6749
	IDR	60.769	14.4788	20.3965	4.35566	64.2613	35.7387
	D→D	57.2499	15.2117	22.7051	4.83327	61.8309	38.1691
	D→O	75	11.5152	11.0606	2.42424	74.0973	25.9027
Poly	all	24.8235	15.6391	54.4689	5.06846	24.439	75.561
	OR	27.5046	15.3556	53.7409	3.39889	26.4651	73.5349
	O→O	27.5808	15.331	53.7447	3.34358	26.7351	73.2649
	O→D	26.1939	15.3401	53.9797	4.48625	21.267	78.733
	IDR	20.8562	16.0586	55.5462	7.53901	21.3471	78.6529
	D→D	19.3664	15.8766	56.777	7.97999	19.8056	80.1944
	D->O	32.3529	17.4632	46.0478	4.13603	33.9031	66.0969
NES	all	8.27862	8.35993	78.1317	5.22978	10.4754	89.5246
	OR	9.11092	8.2523	80.1967	2.4401	12.1276	87.8724
	O→O	9.062	8.20117	80.4025	2.33433	12.1881	87.8119
	O→D	9.97268	9.15301	76.571	4.30328	11.0845	88.9155
	IDR	7.24506	8.49358	75.5673	8.69407	8.43798	91.562
	D→D	6.80312	8.37383	75.7522	9.07083	7.85555	92.1444
	D->O	12.9442	10.0254	73.033	3.99746	15.9104	84.0896
