# Supplementary material for: Disease-Associated Mutations Disrupt Functionally Important Regions of Intrinsic Protein Disorder
Source: PLoS Comput Biol. 2012 Oct 4;8(10):e1002709. doi: 10.1371/journal.pcbi.1002709 (PMC3464192; doi:10.1371/journal.pcbi.1002709)
Supplement: Table S10 — 670 disease mutations from UniProt predicted to result in a D→O transition. (XLS) [file pcbi.1002709.s018.xls]

## Sheet: Sheet1
UniProt	Gene	Position	Wildtype AA	Mutant AA	Wildtype VLXT	Mutant VLXT	Delta VLXT	Disease annotation
P21359	NF1	665	S	F	0.938094	0.0934924	-0.844601	Type 1 neurofibromatosis (NF1) [MIM:162200]
P35222	CTNNB1	37	S	F	0.832054	0.0745779	-0.757476	Pilomatrixoma (PTR) [MIM:132600]
P04062	GBA	224	L	F	0.929012	0.175627	-0.753386	Gaucher disease (GD) [MIM:230800]
P08236	GUSB	176	L	F	0.839556	0.0994241	-0.740132	Mucopolysaccharidosis type 7 (MPS7) [MIM:253220]
Q9Y5X4	NR2E3	76	R	Q	0.79808	0.0599053	-0.738174	Enhanced S cone syndrome (ESCS) [MIM:268100]
Q9Y223	GNE	266	R	W	0.911606	0.184737	-0.726869	Sialuria [MIM:269921]
P04049	RAF1	259	S	F	0.976311	0.258875	-0.717436	Noonan syndrome type 5 (NS5) [MIM:611553]
Q8WZ42	TTN	22823	R	W	0.878836	0.189952	-0.688884	A metastatic melanoma sample
Q9Y276	BCS1L	114	R	W	0.870975	0.195532	-0.675443	Bjoernstad syndrome (BJS) [MIM:262000]
Q8IY17	PNPLA6	929	R	H	0.820322	0.146489	-0.673833	Spastic paraplegia autosomal recessive type 39 (SPG39) [MIM:612020]
Q9Y5X4	NR2E3	76	R	W	0.79808	0.128001	-0.670079	Enhanced S cone syndrome (ESCS) [MIM:268100]
O15266	SHOX	173	R	C	0.843881	0.186824	-0.657058	Leri-Weill dyschondrosteosis (LWD) [MIM:127300]
Q7Z333	SETX	1294	R	C	0.662914	0.0213453	-0.641569	Spinocerebellar ataxia autosomal recessive type 1 (SCAR1) [MIM:606002]
O75914	PAK3	67	R	C	0.730742	0.103793	-0.626949	Mental retardation X-linked type 30 (MRX30) [MIM:300558]
P20807	CAPN3	489	R	Q	0.811663	0.185653	-0.626011	Limb-girdle muscular dystrophy type 2A (LGMD2A) [MIM:253600]
Q16595	FXN	154	I	F	0.923587	0.303366	-0.620221	Friedreich ataxia (FA) [MIM:229300]
P30613	PKLR	485	S	F	0.862606	0.242964	-0.619643	Pyruvate kinase deficiency of red cells (PKRD) [MIM:266200]
P20807	CAPN3	490	R	Q	0.792762	0.175183	-0.617579	Limb-girdle muscular dystrophy type 2A (LGMD2A) [MIM:253600]
Q9Y6H6	KCNE3	83	R	H	0.805753	0.189884	-0.615869	Periodic paralysis hypokalemic (HOKPP) [MIM:170400]; Thyrotoxic hypokalemic periodic paralysis (TPP) [MIM:188580]
P18074	ERCC2	683	R	W	0.983885	0.371055	-0.612829	Xeroderma pigmentosum complementation group D (XP-D) [MIM:278730]
Q9NZC9	SMARCAL1	644	R	W	0.730585	0.117935	-0.612649	Schimke immuno-osseous dysplasia (SIOD) [MIM:242900]
P00747	PLG	235	R	H	0.803239	0.191558	-0.611681	Ligneous conjunctivitis [MIM:217090]
P10071	GLI3	625	R	W	0.663916	0.0639739	-0.599943	Greig cephalo-poly-syndactyly syndrome (GCPS) [MIM:175700]
P25054	APC	1348	R	W	0.649549	0.0511413	-0.598408	Familial adenomatous polyposis (FAP) [MIM:175100]
O43683	BUB1	492	S	Y	0.781685	0.188521	-0.593165	Colorectal cancer
O75923	DYSF	555	R	W	0.667095	0.0761436	-0.590951	Limb-girdle muscular dystrophy type 2B (LGMD2B) [MIM:253601]; Miyoshi myopathy (MM) [MIM:254130]
P51608	MECP2	306	R	C	0.961405	0.373116	-0.58829	Rett syndrome (RTT) [MIM:312750]
P35968	KDR	275	R	L	0.693352	0.109532	-0.58382	A colorectal cancer sample
P04062	GBA	213	L	F	0.65136	0.0705666	-0.580794	Gaucher disease (GD) [MIM:230800]
Q8TCZ9	PKHD1	1081	R	C	0.699213	0.12513	-0.574083	A colorectal cancer sample
Q9Y276	BCS1L	184	R	C	0.758562	0.187148	-0.571414	Bjoernstad syndrome (BJS) [MIM:262000]
Q12840	KIF5A	280	R	C	0.608145	0.0458654	-0.56228	Spastic paraplegia type 10 (SPG10) [MIM:604187]
P50402	EMD	54	S	F	0.772677	0.213493	-0.559184	X-linked Emery-Dreifuss muscular dystrophy (X-EDMD) [MIM:310300]
P54803	GALC	68	S	F	0.777543	0.219565	-0.557978	Leukodystrophy globoid cell (GLD) [MIM:245200]
P21817	RYR1	328	R	W	0.819485	0.263171	-0.556314	Malignant hyperthermia susceptibility type 1 (MHS1) [MIM:145600]
P21439	ABCB4	541	I	F	0.678559	0.123323	-0.555236	Progressive familial intrahepatic cholestasis type 3 (PFIC3) [MIM:602347]
Q99502	EYA1	440	R	Q	0.637617	0.0826933	-0.554924	Branchiootorenal syndrome type 1 (BOR1) [MIM:113650]
P98161	PKD1	2408	R	C	0.592349	0.0383764	-0.553973	Polycystic kidney disease autosomal dominant type 1 (ADPKD1) [MIM:173900]
P43694	GATA4	52	S	F	0.991297	0.438613	-0.552684	Atrial septal defect type 2 (ASD2) [MIM:607941]
Q60I27	ALS2CL	576	L	F	0.70295	0.152105	-0.550845	A breast cancer sample
Q9NZC9	SMARCAL1	586	R	W	0.846978	0.298281	-0.548697	Schimke immuno-osseous dysplasia (SIOD) [MIM:242900]
Q9UBM7	DHCR7	362	R	C	0.782841	0.234751	-0.54809	Smith-Lemli-Opitz syndrome (SLOS) [MIM:270400]
O75161	NPHP4	1192	R	W	0.678215	0.133615	-0.5446	Nephronophthisis type 4 (NPHP4) [MIM:606966]
Q9Y276	BCS1L	183	R	H	0.806859	0.262486	-0.544372	Bjoernstad syndrome (BJS) [MIM:262000]
P35499	SCN4A	1135	R	H	0.881486	0.344459	-0.537027	Periodic paralysis hypokalemic (HOKPP) [MIM:170400]
P33897	ABCD1	401	R	W	0.640608	0.103727	-0.536881	Adrenoleukodystrophy X-linked (X-ALD) [MIM:300100]
Q5HYA8	TMEM67	545	G	E	0.680769	0.151706	-0.529063	Joubert syndrome type 6 (JBTS6) [MIM:610688]
P08559	PDHA1	72	R	C	0.732787	0.20457	-0.528217	Pyruvate decarboxylase E1 component deficiency (PDHE1 deficiency) [MIM:312170]
P30613	PKLR	426	R	W	0.646617	0.121494	-0.525124	Pyruvate kinase deficiency of red cells (PKRD) [MIM:266200]
P16144	ITGB4	1281	R	W	0.652929	0.132667	-0.520262	Epidermolysis bullosa letalis with pyloric atresia (EB-PA) [MIM:226730]
P25445	FAS	260	D	Y	0.655343	0.138165	-0.517178	Autoimmune lymphoproliferative syndrome type 1A (ALPS1A) [MIM:601859]
Q14896	MYBPC3	501	R	W	0.545517	0.0321309	-0.513386	Cardiomyopathy familial hypertrophic type 4 (CMH4) [MIM:115197]
Q13813	SPTAN1	1794	R	W	0.604528	0.092399	-0.512129	A breast cancer sample
Q14687	GSE1	627	R	W	0.789469	0.278715	-0.510754	A colorectal cancer sample
O43602	DCX	259	R	C	0.667629	0.15798	-0.509649	Subcortical band heterotopia X-linked (SBHX) [MIM:300067]
Q9Y223	GNE	263	R	L	0.826322	0.318545	-0.507777	Sialuria [MIM:269921]
P20823	HNF1A	271	R	W	0.537758	0.0308198	-0.506939	Maturity onset diabetes of the young type 3 (MODY3) [MIM:600496]
P15918	RAG1	975	R	W	0.940498	0.435799	-0.504698	Combined cellular and humoral immune defects with granulomas (CHIDG) [MIM:233650]
P04070	PROC	220	R	W	0.780001	0.278137	-0.501863	Protein C deficiency autosomal dominant (ADPROCD) [MIM:176860]
P00740	F9	43	R	W	0.507158	0.00628417	-0.500873	Recessive X-linked hemophilia B (HEMB) [MIM:306900]
P22304	IDS	468	R	W	0.634746	0.13401	-0.500737	Mucopolysaccharidosis type 2 (MPS2) [MIM:309900]
P04070	PROC	272	R	C	0.543383	0.0426643	-0.500719	Protein C deficiency autosomal dominant (ADPROCD) [MIM:176860]
Q9H792	SGK269	1035	S	F	0.868627	0.368963	-0.499664	A metastatic melanoma sample
P20823	HNF1A	272	R	H	0.561704	0.0635935	-0.49811	Insulin-dependent diabetes mellitus (IDDM) [MIM:222100]; Maturity onset diabetes of the young type 3 (MODY3) [MIM:600496]
P51587	BRCA2	2502	R	H	0.941461	0.443989	-0.497472	Ovarian cancer
P51608	MECP2	306	R	H	0.961405	0.466554	-0.494851	Rett syndrome (RTT) [MIM:312750]
P00740	F9	46	R	T	0.591479	0.0974492	-0.49403	Recessive X-linked hemophilia B (HEMB) [MIM:306900]
Q9NZB8	MOCS1	123	R	W	0.672205	0.179065	-0.49314	Molybdenum cofactor deficiency type A (MOCOD type A) [MIM:252150]
Q99814	EPAS1	537	G	W	0.695927	0.203752	-0.492175	Erythrocytosis familial type 4 (ECYT4) [MIM:611783]
Q17RS7	GEN1	275	R	L	0.585485	0.0995208	-0.485965	A breast cancer sample
P04070	PROC	220	R	Q	0.780001	0.294242	-0.485758	Protein C deficiency autosomal dominant (ADPROCD) [MIM:176860]
P10644	PRKAR1A	289	G	W	0.624311	0.138638	-0.485673	Carney complex type 1 (CNC1) [MIM:160980]
P23508	MCC	506	R	Q	0.739831	0.254724	-0.485107	Colorectal cancer
Q96MT3	PRICKLE1	104	R	Q	0.625465	0.142348	-0.483117	Progressive myoclonic epilepsy type 1B (EPM1B) [MIM:612437]
P01008	SERPINC1	56	R	C	0.804108	0.324354	-0.479754	Antithrombin-III deficiency (AT3D) [MIM:107300]
Q16518	RPE65	515	R	W	0.720947	0.243685	-0.477262	Retinitis pigmentosa type 20 (RP20) [MIM:180069]
P49748	ACADVL	218	E	K	0.615028	0.139197	-0.475831	Very long chain acyl-CoA dehydrogenase deficiency (VLCAD deficiency) [MIM:201475]
P55017	SLC12A3	852	R	C	0.886976	0.411789	-0.475187	Gitelman syndrome (GS) [MIM:263800]
P35222	CTNNB1	33	S	F	0.509894	0.0352935	-0.4746	Medulloblastoma (MDB) [MIM:155255]; Pilomatrixoma (PTR) [MIM:132600]
P17661	DES	454	R	W	0.733715	0.26231	-0.471405	Desmin-related cardio-skeletal myopathy (CSM) [MIM:601419]
P00740	F9	46	R	S	0.591479	0.120985	-0.470494	Recessive X-linked hemophilia B (HEMB) [MIM:306900]
Q13515	BFSP2	287	R	W	0.729407	0.261146	-0.468261	Autosomal dominant multiple types cataract type 1 [MIM:611597]
P08686	CYP21A2	124	R	H	0.569281	0.103168	-0.466113	Adrenal hyperplasia type 3 (AH3) [MIM:201910]
Q92781	RDH5	280	R	H	0.571538	0.106652	-0.464886	Fundus albipunctatus (FA) [MIM:136880]
P10912	GHR	229	R	H	0.922001	0.457797	-0.464204	Short stature [MIM:604271]
Q6NT55	CYP4F22	372	R	W	0.790939	0.329388	-0.461551	Ichthyosis lamellar type 3 (LI3) [MIM:604777]
Q8NFG4	FLCN	79	S	W	0.71611	0.254978	-0.461132	A sporadic colorectal carcinoma
Q06124	PTPN11	502	R	W	0.621226	0.160435	-0.46079	LEOPARD syndrome [MIM:151100]
P37058	HSD17B3	80	R	W	0.586857	0.127528	-0.459329	Male pseudohermaphrodism with gynecomastia (MPH) [MIM:264300]
Q9BSV6	TSEN34	58	R	W	0.759245	0.301017	-0.458228	Pontocerebellar hypoplasia type 2C (PCH2C) [MIM:612390]
P04792	HSPB1	127	R	W	0.593461	0.135699	-0.457762	Distal hereditary motor neuronopathy type 2B (HMN2B) [MIM:608634]
P51608	MECP2	453	R	Q	0.855132	0.397939	-0.457194	Mental retardation syndromic X-linked type 13 (MRXS13) [MIM:300055]
P49746	THBS3	955	R	G	0.713013	0.257121	-0.455892	A breast cancer sample
P19544	WT1	394	R	L	0.508758	0.0542031	-0.454555	Wilms tumor 1 (WT1) [MIM:194070]
Q9Y6H5	SNCAIP	621	R	C	0.816056	0.363625	-0.45243	Parkinson disease (PD) [MIM:168600]
P04062	GBA	232	G	E	0.710138	0.258338	-0.4518	Gaucher disease (GD) [MIM:230800]
Q13402	MYO7A	756	R	W	0.554223	0.104133	-0.45009	Usher syndrome type 1B (USH1B) [MIM:276900]
Q76LX8	ADAMTS13	390	W	C	0.73609	0.288333	-0.447756	Congenital thrombotic thrombocytopenic purpura (TTP) [MIM:274150]
A6NFY7	SDHAF1	55	R	P	0.896559	0.449042	-0.447517	SDH-defective infantile leukoencephalopathy
P20823	HNF1A	203	R	C	0.933247	0.487062	-0.446185	Maturity onset diabetes of the young type 3 (MODY3) [MIM:600496]
P00740	F9	43	R	L	0.507158	0.0613166	-0.445841	Recessive X-linked hemophilia B (HEMB) [MIM:306900]
Q9H165	BCL11A	142	S	F	0.579334	0.133955	-0.445379	A breast cancer sample
P08686	CYP21A2	341	R	W	0.615804	0.170483	-0.445322	Adrenal hyperplasia type 3 (AH3) [MIM:201910]
Q9UIJ5	ZDHHC2	306	S	F	0.800942	0.358065	-0.442876	Hepatocellular carcinoma
Q14896	MYBPC3	501	R	Q	0.545517	0.102931	-0.442586	Cardiomyopathy familial hypertrophic type 4 (CMH4) [MIM:115197]
Q9BXC9	BBS2	643	R	H	0.656394	0.214517	-0.441877	Bardet-Biedl syndrome type 2 (BBS2) [MIM:209900]
P54802	NAGLU	79	G	C	0.796863	0.356285	-0.440578	Mucopolysaccharidosis type 3B (MPS3B) [MIM:252920]
P19544	WT1	394	R	Q	0.508758	0.0683803	-0.440378	Denys-Drash syndrome (DDS) [MIM:194080]
P58012	FOXL2	69	E	K	0.617809	0.178561	-0.439249	Blepharophimosis, ptosis, and epicanthus inversus syndrome (BPES) [MIM:110100]
P08397	HMBS	335	G	D	0.735873	0.298206	-0.437668	Acute intermittent porphyria (AIP) [MIM:176000]
P46019	PHKA2	1125	E	K	0.578779	0.141413	-0.437366	Glycogen storage disease type 9A (GSD9A) [MIM:306000]
P52701	MSH6	1193	E	K	0.70298	0.266031	-0.436948	Endometrial cancer [MIM:608089]
P08603	CFH	1210	R	C	0.529312	0.0931497	-0.436162	Complement factor H deficiency (CFH deficiency) [MIM:609814]
P55291	CDH15	92	R	W	0.510498	0.0757448	-0.434754	Mental retardation autosomal dominant type 3 (MRD3) [MIM:612580]
P48728	AMT	320	R	H	0.76439	0.33079	-0.4336	Non-ketotic hyperglycinemia (NKH) [MIM:605899]
P00533	EGFR	748	R	P	0.626016	0.192739	-0.433277	Lung cancer [MIM:211980]
Q92838	EDA	255	G	C	0.619673	0.186529	-0.433143	Ectodermal dysplasia, type 1 (ED1) [MIM:305100]
O96017	CHEK2	181	R	C	0.569235	0.136329	-0.432906	Prostate cancer
Q9UBM7	DHCR7	450	R	L	0.689064	0.258891	-0.430173	Smith-Lemli-Opitz syndrome (SLOS) [MIM:270400]
Q9Y223	GNE	266	R	Q	0.911606	0.481926	-0.42968	Sialuria [MIM:269921]
Q9BXW9	FANCD2	302	R	W	0.627575	0.19806	-0.429515	Fanconi anemia (FA) [MIM:227650]
P30613	PKLR	486	R	W	0.884632	0.455189	-0.429444	Pyruvate kinase deficiency of red cells (PKRD) [MIM:266200]
P38398	BRCA1	1217	S	Y	0.825199	0.396789	-0.42841	Breast cancer (BC) [MIM:113705, 114480]; Familial breast-ovarian cancer type 1 (BROVCA1) [MIM:604370]
P15848	ARSB	312	W	C	0.641686	0.213486	-0.4282	Mucopolysaccharidosis type 6 (MPS6) [MIM:253200]
P51798	CLCN7	261	I	F	0.59899	0.171215	-0.427776	Osteopetrosis autosomal recessive type 4 (OPTB4) [MIM:611490]
Q16595	FXN	165	R	C	0.538486	0.112951	-0.425536	Friedreich ataxia (FA) [MIM:229300]
Q13255	GRM1	696	R	W	0.920708	0.495499	-0.425209	A colorectal cancer sample
P19544	WT1	394	R	P	0.508758	0.0852761	-0.423482	Denys-Drash syndrome (DDS) [MIM:194080]
O43602	DCX	259	R	L	0.667629	0.245174	-0.422455	Subcortical band heterotopia X-linked (SBHX) [MIM:300067]
P00966	ASS1	307	R	C	0.582732	0.160806	-0.421926	Citrullinemia type 1 (CTLN1) [MIM:215700]
P00966	ASS1	191	E	K	0.556272	0.134819	-0.421454	Citrullinemia type 1 (CTLN1) [MIM:215700]
P09417	QDPR	145	P	L	0.638802	0.220198	-0.418604	BH4-deficient hyperphenylalaninemia type C (HPABH4C) [MIM:261630]
Q13402	MYO7A	853	R	C	0.662261	0.244558	-0.417702	Non-syndromic sensorineural deafness autosomal dominant type 11 (DFNA11) [MIM:601317]
P17661	DES	406	R	W	0.653262	0.236898	-0.416364	Desmin-related cardio-skeletal myopathy (CSM) [MIM:601419]
P00740	F9	43	R	Q	0.507158	0.0912393	-0.415918	Recessive X-linked hemophilia B (HEMB) [MIM:306900]
P15924	DSP	2366	R	C	0.52159	0.105972	-0.415618	Skin fragility-woolly hair syndrome (SFWHS) [MIM:607655]
P20807	CAPN3	567	G	W	0.57689	0.16271	-0.41418	Limb-girdle muscular dystrophy type 2A (LGMD2A) [MIM:253600]
P32004	L1CAM	386	R	C	0.524995	0.111044	-0.413951	Hydrocephalus due to stenosis of the aqueduct of Sylvius (HSAS) [MIM:307000]
Q96S38	RPS6KC1	1022	E	K	0.74974	0.337965	-0.411776	A breast infiltrating ductal carcinoma sample
Q8TAM1	BBS10	49	R	W	0.531958	0.121004	-0.410954	Bardet-Biedl syndrome type 10 (BBS10) [MIM:209900]
P20807	CAPN3	226	E	K	0.595828	0.186733	-0.409094	Limb-girdle muscular dystrophy type 2A (LGMD2A) [MIM:253600]
P03891	MT-ND2	150	N	D	0.754159	0.346995	-0.407164	Leber hereditary optic neuropathy (LHON) [MIM:535000]
Q8N302	AGGF1	133	E	K	0.702746	0.295685	-0.40706	Klippel-Trenaunay syndrome (KTS) [MIM:149000]
P38398	BRCA1	227	E	K	0.552777	0.146745	-0.406031	Ovarian cancer [MIM:113705]
P16219	ACADS	107	R	C	0.599257	0.193511	-0.405746	Short-chain acyl-CoA dehydrogenase deficiency (SCAD deficiency) [MIM:201470]
P21333	FLNA	172	L	F	0.794094	0.388888	-0.405206	Otopalatodigital syndrome type 1 (OPD1) [MIM:311300]
P38398	BRCA1	835	H	Y	0.657177	0.254953	-0.402225	Familial breast-ovarian cancer type 1 (BROVCA1) [MIM:604370]
P05106	ITGB3	119	R	W	0.534136	0.132019	-0.402117	Glanzmann thrombasthenia (GT) [MIM:273800]
Q96QS3	ARX	332	R	H	0.788472	0.386824	-0.401649	Lissencephaly X-linked type 2 (LISX2) [MIM:300215]
P20807	CAPN3	493	R	W	0.756141	0.357433	-0.398708	Limb-girdle muscular dystrophy type 2A (LGMD2A) [MIM:253600]
P08236	GUSB	606	K	N	0.632425	0.233832	-0.398593	Mucopolysaccharidosis type 7 (MPS7) [MIM:253220]
P05093	CYP17A1	496	R	H	0.530454	0.132685	-0.397769	Adrenal hyperplasia type 5 (AH5) [MIM:202110]
P40337	VHL	167	R	W	0.621319	0.223689	-0.39763	Von Hippel-Lindau disease (VHLD) [MIM:193300]; Pheochromocytoma [MIM:171300]
P82987	ADAMTSL3	855	R	C	0.652141	0.254961	-0.397181	A colorectal cancer sample
Q8IUG5	MYO18B	1708	E	K	0.616107	0.218934	-0.397173	Lung adenocarcinoma
Q12809	KCNH2	176	R	W	0.623551	0.227697	-0.395854	Long QT syndrome type 2 (LQT2) [MIM:152427]
Q8WZA1	POMGNT1	265	R	H	0.883446	0.487631	-0.395815	Muscle-eye-brain disease (MEB) [MIM:253280]
P51787	KCNQ1	190	R	Q	0.6951	0.29993	-0.39517	Long QT syndrome type 1 (LQT1) [MIM:192500]
P17661	DES	2	S	I	0.778458	0.383492	-0.394966	Desmin-related cardio-skeletal myopathy (CSM) [MIM:601419]
P08397	HMBS	26	R	C	0.884936	0.49228	-0.392656	Acute intermittent porphyria (AIP) [MIM:176000]
Q9NRP7	STK36	660	S	C	0.760349	0.368636	-0.391713	A breast pleomorphic lobular carcinoma sample
P26367	PAX6	128	R	C	0.68763	0.296164	-0.391466	Foveal hypoplasia [MIM:136520]
P08236	GUSB	150	E	K	0.575608	0.184173	-0.391435	Mucopolysaccharidosis type 7 (MPS7) [MIM:253220]
P51587	BRCA2	448	R	H	0.772771	0.382386	-0.390385	Breast cancer (BC) [MIM:612555, 114480]
Q8IVH4	MMAA	359	R	Q	0.861171	0.470909	-0.390262	Methylmalonic aciduria type cblA (MMAA) [MIM:251100]
P05166	PCCB	165	R	W	0.791777	0.404323	-0.387454	Propionic acidemia type II (PA-2) [MIM:606054]
P55017	SLC12A3	852	R	H	0.886976	0.499857	-0.387119	Gitelman syndrome (GS) [MIM:263800]
Q8WZ42	TTN	32411	R	W	0.698135	0.312108	-0.386028	A gastric adenocarcinoma sample
O43826	SLC37A4	149	G	E	0.717639	0.333018	-0.384621	Glycogen storage disease type 1B (GSD1B) [MIM:232220]
O60828	PQBP1	224	R	W	0.616365	0.231801	-0.384564	A colorectal cancer sample
O76082	SLC22A5	467	S	C	0.749272	0.364922	-0.384351	Systemic primary carnitine deficiency (CDSP) [MIM:212140]
P05186	ALPL	452	E	K	0.691807	0.308674	-0.383133	Hypophosphatasia adult type (hypophosphatasia) [MIM:146300]; Hypophosphatasia childhood (hypophosphatasia) [MIM:241510]; Hypophosphatasia infantile (hypophosphatasia) [MIM:241500]
P22557	ALAS2	452	R	C	0.830479	0.447501	-0.382978	Anemia sideroblastic X-linked (XLSA) [MIM:300751]
P55017	SLC12A3	186	G	D	0.757969	0.375756	-0.382214	Gitelman syndrome (GS) [MIM:263800]
P49815	TSC2	1240	R	W	0.614761	0.233044	-0.381717	Tuberous sclerosis complex (TSC) [MIM:191100]
Q8IVH4	MMAA	359	R	G	0.861171	0.480869	-0.380303	Methylmalonic aciduria type cblA (MMAA) [MIM:251100]
P04062	GBA	234	G	E	0.559069	0.17884	-0.380229	Gaucher disease (GD) [MIM:230800]
P40337	VHL	176	R	W	0.509612	0.132058	-0.377554	Von Hippel-Lindau disease (VHLD) [MIM:193300]
P35499	SCN4A	1132	R	Q	0.832516	0.455695	-0.376821	Periodic paralysis hypokalemic (HOKPP) [MIM:170400]
Q13315	ATM	3008	R	C	0.617114	0.240678	-0.376436	Ataxia telangiectasia (AT) [MIM:208900]
P00813	ADA	211	R	C	0.537225	0.161863	-0.375362	Severe combined immunodeficiency autosomal recessive T-cell-negative/B-cell-negative/NK-cell-negative due to adenosine deaminase deficiency (ADASCID) [MIM:102700]
P03971	AMH	123	R	W	0.531295	0.156628	-0.374667	Persistent Muellerian duct syndrome type 1 (PMDS-1) [MIM:261550]
Q7KZN9	COX15	217	R	W	0.560149	0.185792	-0.374357	Cytochrome c oxidase deficiency (COX deficiency) [MIM:220110]; Leigh syndrome [MIM:256000]
P00966	ASS1	108	R	L	0.597237	0.224698	-0.372539	Citrullinemia type 1 (CTLN1) [MIM:215700]
P20807	CAPN3	489	R	W	0.811663	0.439501	-0.372162	Limb-girdle muscular dystrophy type 2A (LGMD2A) [MIM:253600]
P22304	IDS	469	P	H	0.580432	0.20868	-0.371751	Mucopolysaccharidosis type 2 (MPS2) [MIM:309900]
P48382	RFX5	149	R	Q	0.74889	0.379003	-0.369887	Bare lymphocyte syndrome type 2 (BLS2) [MIM:209920]
P15104	GLUL	324	R	C	0.616503	0.247715	-0.368788	Congenital systemic glutamine deficiency (CSGD) [MIM:610015]
P17813	ENG	49	V	F	0.63232	0.263888	-0.368432	Hereditary hemorrhagic telangiectasia type 1 (HHT1) [MIM:187300, 108010]
Q5SZL2	C6orf204	345	S	F	0.82976	0.461691	-0.368069	A breast cancer sample
P00488	F13A1	682	R	H	0.710181	0.342748	-0.367433	F13A deficiency [MIM:134570]
P04062	GBA	230	V	E	0.8551	0.489386	-0.365714	Gaucher disease (GD) [MIM:230800]
Q76G19	PDZD4	39	R	C	0.566972	0.201602	-0.365371	A breast cancer sample
Q9NZC9	SMARCAL1	645	R	C	0.744667	0.38003	-0.364637	Schimke immuno-osseous dysplasia (SIOD) [MIM:242900]
O15269	SPTLC1	239	R	W	0.737563	0.373755	-0.363808	A breast cancer sample
Q8NFY9	KBTBD8	405	R	K	0.502601	0.138967	-0.363633	A breast cancer sample
Q8TCZ9	PKHD1	739	P	L	0.759315	0.396872	-0.362443	Polycystic kidney disease autosomal recessive (ARPKD) [MIM:263200]
P45381	ASPA	186	V	F	0.628262	0.267087	-0.361175	Canavan disease (CAND) [MIM:271900]
Q3SY77	UGT3A2	515	R	H	0.540127	0.179596	-0.36053	A colorectal cancer sample
P37287	PIGA	19	R	W	0.816731	0.456555	-0.360176	Paroxysmal nocturnal hemoglobinuria (PNH) [MIM:311770]
Q9GZX3	CHST6	205	R	L	0.668156	0.308141	-0.360015	Macular corneal dystrophy (MCD) [MIM:217800]
Q16512	PKN1	185	R	C	0.554238	0.194603	-0.359635	A metastatic melanoma sample
P13569	CFTR	31	R	L	0.591837	0.237422	-0.354415	Cystic fibrosis (CF) [MIM:219700]
P04150	NR3C1	477	R	H	0.749952	0.39642	-0.353532	Glucocorticoid resistance [MIM:138040]
P15313	ATP6V1B1	346	P	R	0.757161	0.403801	-0.35336	Distal renal tubular acidosis with deafness (dRTA) [MIM:267300]
O96017	CHEK2	181	R	H	0.569235	0.216095	-0.35314	Prostate cancer
P35222	CTNNB1	37	S	C	0.832054	0.480056	-0.351998	Ovarian cancer [MIM:167000]; Pilomatrixoma (PTR) [MIM:132600]
Q13253	NOG	48	E	K	0.669125	0.318858	-0.350267	Brachydactyly type B2 (BDB2) [MIM:611377]
Q9Y6K9	IKBKG	319	R	Q	0.717492	0.367226	-0.350266	X-linked familial atypical micobacteriosis type 1 (AMCBX1) [MIM:300636]
P05186	ALPL	108	P	L	0.583066	0.232945	-0.350121	Hypophosphatasia adult type (hypophosphatasia) [MIM:146300]; Hypophosphatasia childhood (hypophosphatasia) [MIM:241510]; Hypophosphatasia infantile (hypophosphatasia) [MIM:241500]
P37023	ACVRL1	374	R	W	0.6568	0.306732	-0.350069	Hereditary hemorrhagic telangiectasia type 2 (HHT2) [MIM:600376]
P20807	CAPN3	572	R	W	0.755005	0.405796	-0.349208	Limb-girdle muscular dystrophy type 2A (LGMD2A) [MIM:253600]
P50542	PEX5	600	S	W	0.505992	0.156901	-0.34909	Infantile Refsum disease (IRD) [MIM:266510]
P01008	SERPINC1	79	R	C	0.653661	0.305602	-0.348059	Antithrombin-III deficiency (AT3D) [MIM:107300]
P51460	INSL3	93	P	L	0.662716	0.315788	-0.346928	Cryptorchidism [MIM:219050]
P05093	CYP17A1	496	R	C	0.530454	0.184415	-0.346039	Adrenal hyperplasia type 5 (AH5) [MIM:202110]
P38935	IGHMBP2	603	R	H	0.554074	0.208141	-0.345933	Distal hereditary motor neuronopathy type 6 (HMN6) [MIM:604320]
O75398	DEAF1	356	E	H	0.688728	0.343047	-0.345681	A primary colorectal cancer
Q15067	ACOX1	178	G	C	0.773374	0.428268	-0.345106	Adrenoleukodystrophy pseudoneonatal (Pseudo-NALD) [MIM:264470]
P20807	CAPN3	490	R	W	0.792762	0.44847	-0.344292	Limb-girdle muscular dystrophy type 2A (LGMD2A) [MIM:253600]
Q9H3D4	TP63	343	R	Q	0.608378	0.264502	-0.343876	Ectrodactyly-ectodermal dysplasia-cleft lip/palate syndrome type 3 (EEC3) [MIM:604292]
Q96L34	MARK4	418	R	C	0.52454	0.182438	-0.342102	A colorectal adenocarcinoma sample
P30613	PKLR	385	R	W	0.813767	0.47208	-0.341687	Pyruvate kinase deficiency of red cells (PKRD) [MIM:266200]
P81172	HAMP	59	R	G	0.583483	0.245719	-0.337764	Hemochromatosis type 2B (HFE2B) [MIM:602390]
Q9BUP3	HTATIP2	108	D	Y	0.527257	0.190158	-0.337099	Hepatocellular carcinoma
P61916	NPC2	47	C	F	0.597407	0.261212	-0.336194	Niemann-Pick disease type C2 (NPC2) [MIM:607625]
Q9UBP0	SPAST	562	R	Q	0.704832	0.370799	-0.334033	Spastic paraplegia autosomal dominant type 4 (SPG4) [MIM:182601]
P09874	PARP1	488	E	V	0.556374	0.223907	-0.332468	A breast cancer sample
Q13751	LAMB3	210	E	K	0.517933	0.185765	-0.332167	Generalized atrophic benign epidermolysis bullosa (GABEB) [MIM:226650]
P15289	ARSA	82	P	L	0.802985	0.470827	-0.332158	Leukodystrophy metachromatic (MLD) [MIM:250100]
P30613	PKLR	130	S	Y	0.729438	0.399306	-0.330132	Pyruvate kinase deficiency of red cells (PKRD) [MIM:266200]
P41181	AQP2	64	G	R	0.503546	0.173571	-0.329975	Diabetes insipidus nephrogenic autosomal (ANDI) [MIM:125800]
P04424	ASL	456	R	W	0.591058	0.263416	-0.327643	Arginosuccinicaciduria (ARGINSA) [MIM:207900]
Q9UBP0	SPAST	562	R	G	0.704832	0.377797	-0.327036	Spastic paraplegia autosomal dominant type 4 (SPG4) [MIM:182601]
Q9UMD9	COL17A1	265	S	C	0.598603	0.271746	-0.326857	Generalized atrophic benign epidermolysis bullosa (GABEB) [MIM:226650]
P42898	MTHFR	357	R	C	0.665129	0.339706	-0.325423	Methylenetetrahydrofolate reductase deficiency (MTHFRD) [MIM:236250]
Q8NFD2	ANKK1	347	K	T	0.763886	0.438567	-0.325318	A breast infiltrating ductal carcinoma sample
Q96CV9	OPTN	545	R	Q	0.541703	0.216517	-0.325186	Primary open angle glaucoma type 1E (GLC1E) [MIM:137760]
O15305	PMM2	141	R	C	0.66572	0.34056	-0.32516	Congenital disorder of glycosylation type 1A (CDG1A) [MIM:212065]
O95255	ABCC6	765	R	Q	0.68159	0.358701	-0.32289	Pseudoxanthoma elasticum (PXE) [MIM:264800]
Q99959	PKP2	140	S	F	0.794988	0.475532	-0.319457	Familial arrhythmogenic right ventricular dysplasia 9 (ARVD9) [MIM:609040]
P00747	PLG	374	V	F	0.664032	0.344592	-0.31944	Thrombophilia [MIM:188050]
Q00604	NDP	104	K	Q	0.533722	0.214616	-0.319106	Norrie disease (ND) [MIM:310600]
Q13402	MYO7A	1883	R	Q	0.722855	0.404028	-0.318826	Usher syndrome type 1B (USH1B) [MIM:276900]
Q13402	MYO7A	1327	E	K	0.625824	0.307186	-0.318638	Usher syndrome type 1B (USH1B) [MIM:276900]
P11217	PYGM	655	E	K	0.545639	0.227921	-0.317718	Glycogen storage disease type 5 (GSD5) [MIM:232600]
P07225	PROS1	40	R	L	0.782346	0.464922	-0.317423	Protein S deficiency (PROS1D) [MIM:612336]
Q9H3D4	TP63	243	R	W	0.620703	0.303398	-0.317305	Ectrodactyly-ectodermal dysplasia-cleft lip/palate syndrome type 3 (EEC3) [MIM:604292]
P04062	GBA	215	A	D	0.802678	0.486148	-0.31653	Gaucher disease (GD) [MIM:230800]
P35625	TIMP3	204	S	C	0.617629	0.302112	-0.315517	Sorsby fundus dystrophy (SFD) [MIM:136900]
P37023	ACVRL1	479	R	L	0.538143	0.222718	-0.315425	Hereditary hemorrhagic telangiectasia type 2 (HHT2) [MIM:600376]
Q9UBP0	SPAST	551	A	Y	0.533974	0.218636	-0.315338	Spastic paraplegia autosomal dominant type 4 (SPG4) [MIM:182601]
O75398	DEAF1	449	E	K	0.636805	0.322005	-0.3148	A primary colorectal cancer
P16473	TSHR	310	R	C	0.690436	0.376178	-0.314258	Congenital hypothyroidism non-goitrous type 1 (CHNG1) [MIM:275200]
P26367	PAX6	125	R	C	0.565696	0.252048	-0.313648	Foveal hypoplasia [MIM:136520]
Q13402	MYO7A	241	R	C	0.550879	0.238418	-0.312461	Usher syndrome type 1B (USH1B) [MIM:276900]
Q9UBF9	MYOT	95	S	I	0.708036	0.395845	-0.31219	Myotilinopathy [MIM:609200]
Q92834	RPGR	285	E	G	0.597076	0.285865	-0.311211	Retinitis pigmentosa type 3 (RP3) [MIM:300389]
Q05066	SRY	62	R	G	0.533131	0.222075	-0.311056	Gonadal dysgenesis XY female type (GDXY) [MIM:306100]
P20823	HNF1A	205	K	Q	0.737711	0.426827	-0.310885	Maturity onset diabetes of the young type 3 (MODY3) [MIM:600496]
Q9H4A3	WNK1	2190	S	C	0.56409	0.253573	-0.310517	A breast pleomorphic lobular carcinoma sample
Q9UNH5	CDC14A	493	D	Y	0.699069	0.389642	-0.309427	A colorectal cancer sample
P54802	NAGLU	452	E	K	0.724753	0.415394	-0.309359	Mucopolysaccharidosis type 3B (MPS3B) [MIM:252920]
Q9HBX8	LGR6	725	G	C	0.523	0.213711	-0.309289	A colorectal cancer sample
P55084	HADHB	247	R	H	0.63929	0.330595	-0.308695	Trifunctional protein deficiency (TFP deficiency) [MIM:609015]
P22033	MUT	621	K	N	0.779152	0.470818	-0.308335	Methylmalonic aciduria type mut (MMAM) [MIM:251000]
P00813	ADA	211	R	H	0.537225	0.228976	-0.308249	Severe combined immunodeficiency autosomal recessive T-cell-negative/B-cell-negative/NK-cell-negative due to adenosine deaminase deficiency (ADASCID) [MIM:102700]
Q96P20	NLRP3	859	Y	C	0.512965	0.205224	-0.30774	Chronic infantile neurologic cutaneous and articular syndrome (CINCA) [MIM:607115]
Q9UI10	EIF2B4	357	R	Q	0.50774	0.201246	-0.306494	Leukodystrophy with vanishing white matter (VWM) [MIM:603896]
Q8NG66	NEK11	492	E	K	0.721504	0.415763	-0.305741	A colorectal adenocarcinoma sample
P13569	CFTR	50	S	Y	0.741432	0.435871	-0.305561	Congenital bilateral absence of the vas deferens (CBAVD) [MIM:277180]
Q9GZX3	CHST6	205	R	Q	0.668156	0.36366	-0.304496	Macular corneal dystrophy (MCD) [MIM:217800]
P43246	MSH2	393	K	M	0.573656	0.269757	-0.3039	Hereditary non-polyposis colorectal cancer type 1 (HNPCC1) [MIM:120435]
P30566	ADSL	374	R	W	0.536617	0.233482	-0.303135	Adenylosuccinase deficiency (ADSL deficiency) [MIM:103050]
P54802	NAGLU	521	P	L	0.761528	0.45914	-0.302388	Mucopolysaccharidosis type 3B (MPS3B) [MIM:252920]
Q9Y6X0	SETBP1	1108	R	W	0.503463	0.201604	-0.301859	A colorectal cancer sample
P19544	WT1	394	R	W	0.508758	0.207194	-0.301565	Denys-Drash syndrome (DDS) [MIM:194080]; Meacham syndrome [MIM:608978]; Wilms tumor 1 (WT1) [MIM:194070]
O14827	RASGRF2	114	R	H	0.719003	0.418933	-0.300069	A colorectal cancer sample
Q13315	ATM	3008	R	H	0.617114	0.317797	-0.299317	B-cell chronic lymphocytic leukemia (BCLL)
Q8NAP8	ZBTB8B	181	E	K	0.7136	0.414837	-0.298762	A colorectal cancer sample
P15848	ARSB	315	R	Q	0.738587	0.440939	-0.297648	Mucopolysaccharidosis type 6 (MPS6) [MIM:253200]
P08237	PFKM	686	W	C	0.571327	0.275599	-0.295728	Glycogen storage disease type 7 (GSD7) [MIM:232800]
P80365	HSD11B2	337	R	C	0.507481	0.212063	-0.295417	Apparent mineralocorticoid excess (AME) [MIM:218030]
P01008	SERPINC1	79	R	H	0.653661	0.358789	-0.294872	Antithrombin-III deficiency (AT3D) [MIM:107300]
P43246	MSH2	622	P	L	0.663594	0.368972	-0.294622	Hereditary non-polyposis colorectal cancer type 1 (HNPCC1) [MIM:120435]
O75445	USH2A	1059	P	L	0.726107	0.432759	-0.293348	Usher syndrome type 2A (USH2A) [MIM:276901]
Q7Z333	SETX	332	R	W	0.67166	0.378558	-0.293102	Spinocerebellar ataxia autosomal recessive type 1 (SCAR1) [MIM:606002]
P07225	PROS1	545	E	G	0.584537	0.291792	-0.292745	A colorectal cancer sample
P16219	ACADS	380	R	W	0.535335	0.242612	-0.292724	Short-chain acyl-CoA dehydrogenase deficiency (SCAD deficiency) [MIM:201470]
P20807	CAPN3	360	W	C	0.580805	0.289019	-0.291786	Limb-girdle muscular dystrophy type 2A (LGMD2A) [MIM:253600]
P80365	HSD11B2	213	R	C	0.778403	0.487928	-0.290475	Apparent mineralocorticoid excess (AME) [MIM:218030]
P00441	SOD1	94	G	C	0.611719	0.321787	-0.289932	Amyotrophic lateral sclerosis type 1 (ALS1) [MIM:105400]
P10253	GAA	455	Y	F	0.630553	0.340787	-0.289766	Glycogen storage disease type 2 (GSD2) [MIM:232300]
P35520	CBS	145	P	L	0.741667	0.452254	-0.289412	Cystathionine beta-synthase deficiency (CBSD) [MIM:236200]
P51798	CLCN7	249	P	R	0.592824	0.303525	-0.289299	Osteopetrosis autosomal recessive type 4 (OPTB4) [MIM:611490]
O60880	SH2D1A	101	P	L	0.534197	0.245846	-0.288351	Lymphoproliferative syndrome X-linked type 1 (XLP1) [MIM:308240]
P08559	PDHA1	288	R	H	0.514978	0.226823	-0.288155	Pyruvate decarboxylase E1 component deficiency (PDHE1 deficiency) [MIM:312170]
O14896	IRF6	45	R	Q	0.510533	0.222594	-0.287939	Van der Woude syndrome (VWS) [MIM:119300]
Q9UJF2	RASAL2	165	R	W	0.657973	0.370084	-0.287889	A colorectal cancer sample
Q01484	ANK2	3898	E	K	0.708689	0.421057	-0.287632	Long QT syndrome type 4 (LQT4) [MIM:600919]
P33897	ABCD1	274	R	W	0.770286	0.483131	-0.287154	Adrenoleukodystrophy X-linked (X-ALD) [MIM:300100]
P54802	NAGLU	334	V	F	0.533197	0.249087	-0.28411	Mucopolysaccharidosis type 3B (MPS3B) [MIM:252920]
P18887	XRCC1	350	R	W	0.538427	0.254402	-0.284024	A colorectal cancer sample
Q9H251	CDH23	1507	R	Q	0.519749	0.236649	-0.283101	Usher syndrome type 1D (USH1D) [MIM:601067]
O15273	TCAP	132	E	Q	0.718575	0.43792	-0.280654	Cardiomyopathy dilated type 1N (CMD1N) [MIM:607487]
P60174	TPI1	105	E	D	0.582808	0.302248	-0.28056	Triosephosphate isomerase deficiency (TPI deficiency) [MIM:190450]
P98161	PKD1	4154	R	C	0.696898	0.418038	-0.27886	Polycystic kidney disease autosomal dominant type 1 (ADPKD1) [MIM:173900]
Q96RR1	PEO1	319	K	T	0.549791	0.273563	-0.276228	Progressive external ophthalmoplegia with mitochondrial DNA deletions autosomal dominant type 3 (PEOA3) [MIM:609286]
Q6P5W5	SLC39A4	95	R	C	0.6333	0.357929	-0.275371	Acrodermatitis enteropathica zinc-deficiency type (AEZ) [MIM:201100]
P22304	IDS	467	P	L	0.645855	0.370763	-0.275092	Mucopolysaccharidosis type 2 (MPS2) [MIM:309900]
P35557	GCK	70	E	K	0.66059	0.38621	-0.27438	Maturity onset diabetes of the young type 2 (MODY2) [MIM:125851]
P21817	RYR1	177	R	C	0.509094	0.236854	-0.27224	Malignant hyperthermia susceptibility type 1 (MHS1) [MIM:145600]
Q16878	CDO1	143	E	Q	0.558465	0.286988	-0.271477	A colorectal cancer sample
Q9HBY8	SGK2	259	E	K	0.574086	0.303456	-0.270629	A lung adenocarcinoma sample
P09417	QDPR	158	H	Y	0.556782	0.286823	-0.269959	BH4-deficient hyperphenylalaninemia type C (HPABH4C) [MIM:261630]
P05165	PCCA	52	R	W	0.607961	0.339806	-0.268155	Propionic acidemia type I (PA-1) [MIM:606054]
P21817	RYR1	401	R	C	0.623366	0.355429	-0.267937	Malignant hyperthermia susceptibility type 1 (MHS1) [MIM:145600]
Q15349	RPS6KA2	732	R	Q	0.613619	0.346167	-0.267451	A colorectal adenocarcinoma sample
Q07837	SLC3A1	452	R	W	0.719186	0.452044	-0.267143	Cystinuria type I (CSNU1) [MIM:220100]
P49638	TTPA	141	E	K	0.566092	0.298956	-0.267136	Ataxia with isolated vitamin E deficiency (AVED) [MIM:277460]
P20823	HNF1A	159	R	Q	0.729773	0.462819	-0.266953	Maturity onset diabetes of the young type 3 (MODY3) [MIM:600496]
P04198	MYCN	394	R	H	0.656797	0.390156	-0.266641	Feingold syndrome [MIM:164280]
O15305	PMM2	141	R	H	0.66572	0.399395	-0.266325	Congenital disorder of glycosylation type 1A (CDG1A) [MIM:212065]
O43826	SLC37A4	153	P	L	0.744405	0.478102	-0.266303	Glycogen storage disease type 1B (GSD1B) [MIM:232220]
P19113	HDC	49	E	V	0.72146	0.455163	-0.266297	A colorectal cancer sample
P04156	PRNP	200	E	K	0.701166	0.435046	-0.26612	Creutzfeldt-Jakob disease (CJD) [MIM:123400]; High quantity in the brain of humans and animals infected with neurodegenerative diseases known as transmissible spongiform encephalopathies or prion diseases, like: Creutzfeldt-Jakob disease (CJD)
Q9UM01	SLC7A7	5	T	I	0.679159	0.413996	-0.265163	Lysinuric protein intolerance (LPI) [MIM:222700]
Q14896	MYBPC3	450	E	Q	0.663026	0.398899	-0.264126	Cardiomyopathy familial hypertrophic type 4 (CMH4) [MIM:115197]
Q9Y3A5	SBDS	126	R	T	0.503536	0.239574	-0.263962	Shwachman-Diamond syndrome (SDS) [MIM:260400]
Q02556	IRF8	81	R	K	0.656479	0.392878	-0.263601	A breast cancer sample
P45381	ASPA	183	P	H	0.713686	0.450771	-0.262915	Canavan disease (CAND) [MIM:271900]
P23109	AMPD1	425	R	H	0.508762	0.24615	-0.262612	Adenosine monophosphate deaminase deficiency muscle type (AMPDDM) [MIM:102770]
Q96J92	WNK4	1185	R	C	0.660108	0.397749	-0.262359	Pseudohypoaldosteronism type II (PHAII) [MIM:145260]
P05165	PCCA	398	P	L	0.637725	0.375836	-0.261889	Propionic acidemia type I (PA-1) [MIM:606054]
Q16518	RPE65	91	R	Q	0.6201	0.358307	-0.261792	Leber congenital amaurosis type 2 (LCA2) [MIM:204100]
P14679	TYR	361	S	R	0.671803	0.410206	-0.261597	Oculocutaneous albinism type IA (OCA-IA) [MIM:203100]
P51787	KCNQ1	583	R	C	0.589479	0.328072	-0.261407	Long QT syndrome type 1 (LQT1) [MIM:192500]
O14832	PHYH	83	N	Y	0.588071	0.32784	-0.260231	Refsum disease (RD) [MIM:266500]
O75360	PROP1	73	R	C	0.641883	0.381766	-0.260116	Combined pituitary hormone deficiency (CPHD) [MIM:601538, 262600]
P04198	MYCN	393	R	H	0.719666	0.45981	-0.259856	Feingold syndrome [MIM:164280]
P21817	RYR1	2348	E	G	0.568303	0.309174	-0.259129	Malignant hyperthermia susceptibility type 1 (MHS1) [MIM:145600]
P61764	STXBP1	180	C	Y	0.522538	0.265112	-0.257426	Epileptic encephalopathy early infantile type 4 (EIEE4) [MIM:612164]
P00441	SOD1	101	E	K	0.515018	0.259772	-0.255246	Amyotrophic lateral sclerosis type 1 (ALS1) [MIM:105400]
P35222	CTNNB1	33	S	Y	0.509894	0.256114	-0.25378	Colorectal cancer (CRC) [MIM:114500]; Pilomatrixoma (PTR) [MIM:132600]
P30613	PKLR	498	R	C	0.529089	0.275335	-0.253754	Pyruvate kinase deficiency of red cells (PKRD) [MIM:266200]
P58012	FOXL2	58	S	L	0.655909	0.4022	-0.253709	Blepharophimosis, ptosis, and epicanthus inversus syndrome (BPES) [MIM:110100]
P23786	CPT2	50	P	H	0.658931	0.405953	-0.252979	Carnitine palmitoyltransferase II deficiency (CPT-II deficiency) [MIM:255110, 600649]; Lethal neonatal carnitine palmitoyltransferase II deficiency (CPT-II deficiency) [MIM:608836]
P05186	ALPL	450	R	C	0.705321	0.452993	-0.252328	Hypophosphatasia adult type (hypophosphatasia) [MIM:146300]; Hypophosphatasia childhood (hypophosphatasia) [MIM:241510]; Hypophosphatasia infantile (hypophosphatasia) [MIM:241500]
P43246	MSH2	17	V	F	0.530546	0.278453	-0.252094	Gastric cancer
P40692	MLH1	385	R	C	0.521088	0.26943	-0.251658	Hereditary non-polyposis colorectal cancer type 2 (HNPCC2) [MIM:609310]
P04198	MYCN	393	R	S	0.719666	0.468345	-0.251321	Feingold syndrome [MIM:164280]
P13569	CFTR	42	S	F	0.536851	0.285935	-0.250917	Cystic fibrosis (CF) [MIM:219700]
Q15831	STK11	297	R	K	0.536166	0.285501	-0.250665	Peutz-Jeghers syndrome (PJS) [MIM:175200]
Q8TF17	SH3TC2	657	E	K	0.703204	0.45378	-0.249423	Charcot-Marie-Tooth disease type 4C (CMT4C) [MIM:601596]
P45379	TNNT2	102	R	W	0.606379	0.357209	-0.24917	Cardiomyopathy familial hypertrophic type 2 (CMH2) [MIM:115195]
Q8TCZ9	PKHD1	1995	E	G	0.665506	0.416907	-0.248599	Polycystic kidney disease autosomal recessive (ARPKD) [MIM:263200]
P05093	CYP17A1	428	P	L	0.500501	0.252348	-0.248154	Adrenal hyperplasia type 5 (AH5) [MIM:202110]
Q9ULD2	MTUS1	75	Q	K	0.615381	0.367936	-0.247446	Hepatocellular carcinoma (HCC) [MIM:114550]
P27918	CFP	3	T	I	0.669243	0.422724	-0.246519	A breast cancer sample
P54802	NAGLU	520	R	W	0.725365	0.479248	-0.246117	Mucopolysaccharidosis type 3B (MPS3B) [MIM:252920]
P42898	MTHFR	335	R	C	0.665747	0.419635	-0.246112	Methylenetetrahydrofolate reductase deficiency (MTHFRD) [MIM:236250]
Q13144	EIF2B5	195	R	C	0.648512	0.403106	-0.245406	Leukodystrophy with vanishing white matter (VWM) [MIM:603896]
P33402	GUCY1A2	681	E	V	0.613051	0.36816	-0.244891	A colorectal cancer sample
Q96A65	EXOC4	220	S	F	0.57258	0.327979	-0.244601	A colorectal cancer sample
Q15582	TGFBI	622	N	K	0.579655	0.335669	-0.243986	Lattice corneal dystrophy type 3A (CDL3A) [MIM:608471]
P13569	CFTR	287	N	Y	0.563255	0.319968	-0.243287	Cystic fibrosis (CF) [MIM:219700]
P02649	APOE	176	R	C	0.66588	0.422712	-0.243168	Hyperlipoproteinemia type III [MIM:107741]
P48436	SOX9	108	P	L	0.68705	0.445198	-0.241852	Campomelic dysplasia (CMD1) [MIM:114290]
P40337	VHL	167	R	Q	0.621319	0.379701	-0.241618	Von Hippel-Lindau disease (VHLD) [MIM:193300]; Pheochromocytoma [MIM:171300]
P08235	NR3C2	659	R	S	0.502118	0.260597	-0.241521	Autosomal dominant pseudohypoaldosteronism type I (PHA1) [MIM:177735]
O15021	MAST4	2470	E	D	0.716504	0.475835	-0.240669	A lung squamous cell carcinoma sample
P05186	ALPL	426	G	C	0.541299	0.301375	-0.239924	Hypophosphatasia adult type (hypophosphatasia) [MIM:146300]; Hypophosphatasia childhood (hypophosphatasia) [MIM:241510]; Hypophosphatasia infantile (hypophosphatasia) [MIM:241500]
P11172	UMPS	96	R	G	0.672725	0.433643	-0.239083	Hereditary orotic aciduria (HOA) [MIM:258900]
Q13144	EIF2B5	650	E	K	0.553424	0.314982	-0.238442	Leukodystrophy with vanishing white matter (VWM) [MIM:603896]
P43251	BTD	538	R	C	0.65179	0.413434	-0.238356	Biotinidase deficiency (BTD deficiency) [MIM:253260]
P40337	VHL	167	R	G	0.621319	0.384288	-0.23703	Von Hippel-Lindau disease (VHLD) [MIM:193300]
Q9GZX3	CHST6	202	R	S	0.526134	0.290692	-0.235443	Macular corneal dystrophy (MCD) [MIM:217800]
Q14896	MYBPC3	833	R	W	0.61555	0.380125	-0.235425	Cardiomyopathy familial hypertrophic type 4 (CMH4) [MIM:115197]
P08590	MYL3	143	E	K	0.540043	0.304635	-0.235408	Cardiomyopathy familial hypertrophic type 8 (CMH8) [MIM:608751]
Q14126	DSG2	49	R	H	0.64436	0.409492	-0.234868	Familial arrhythmogenic right ventricular dysplasia 10 (ARVD10) [MIM:610193]
Q5UIP0	RIF1	1784	E	K	0.650252	0.415705	-0.234547	A breast cancer sample
P30613	PKLR	427	E	A	0.639428	0.405064	-0.234365	Pyruvate kinase deficiency of red cells (PKRD) [MIM:266200]
Q7Z494	NPHP3	397	R	H	0.639317	0.405326	-0.233991	Nephronophthisis type 3 (NPHP3) [MIM:604387]
P80365	HSD11B2	180	S	F	0.548221	0.315605	-0.232616	Apparent mineralocorticoid excess (AME) [MIM:218030]
Q16671	AMHR2	504	R	C	0.571856	0.339459	-0.232397	Persistent Muellerian duct syndrome type 2 (PMDS-2) [MIM:261550]
Q9Y4A5	TRRAP	1932	P	L	0.564016	0.333553	-0.230463	A colorectal adenocarcinoma sample
P35520	CBS	369	R	C	0.529719	0.301241	-0.228478	Cystathionine beta-synthase deficiency (CBSD) [MIM:236200]
P34059	GALNS	53	S	F	0.593948	0.365951	-0.227996	Mucopolysaccharidosis type 4A (MPS4A) [MIM:253000]
P40337	VHL	200	R	W	0.703005	0.475497	-0.227507	Von Hippel-Lindau disease (VHLD) [MIM:193300]; Erythrocytosis familial type 2 (ECYT2) [MIM:263400]
Q9BXM7	PINK1	464	R	H	0.5546	0.327254	-0.227346	Autosomal recessive early-onset Parkinson disease 6 (PARK6) [MIM:605909, 168600]
P10636	MAPT	659	E	V	0.660428	0.43445	-0.225978	Frontotemporal dementia and parkinsonism linked to chromosome 17 (FTDP17) [MIM:600274, 172700]
Q15198	PDGFRL	23	H	Y	0.700161	0.476379	-0.223782	Colorectal cancer (CRC) [MIM:114500]
P55017	SLC12A3	958	R	G	0.677234	0.454776	-0.222458	Gitelman syndrome (GS) [MIM:263800]
P28329	CHAT	482	R	G	0.607506	0.386292	-0.221214	Congenital myasthenic syndrome with episodic apnea (CMSEA) [MIM:254210]
P00441	SOD1	101	E	G	0.515018	0.294225	-0.220793	Amyotrophic lateral sclerosis type 1 (ALS1) [MIM:105400]
Q9NZ52	GGA3	574	P	L	0.506642	0.286006	-0.220636	A breast cancer sample
P11310	ACADM	53	R	C	0.712546	0.493135	-0.219411	Medium-chain acyl-CoA dehydrogenase deficiency (MCAD deficiency) [MIM:201450]
P20807	CAPN3	541	R	Q	0.66715	0.447869	-0.21928	Limb-girdle muscular dystrophy type 2A (LGMD2A) [MIM:253600]
P19544	WT1	360	C	Y	0.611774	0.392871	-0.218903	Denys-Drash syndrome (DDS) [MIM:194080]
P01008	SERPINC1	79	R	S	0.653661	0.436243	-0.217418	Antithrombin-III deficiency (AT3D) [MIM:107300]
P21333	FLNA	254	E	K	0.567638	0.350852	-0.216786	Otopalatodigital syndrome type 2 (OPD2) [MIM:304120]
O75360	PROP1	73	R	H	0.641883	0.42547	-0.216413	Combined pituitary hormone deficiency (CPHD) [MIM:601538, 262600]
P33897	ABCD1	291	E	K	0.561373	0.345274	-0.2161	Adrenoleukodystrophy X-linked (X-ALD) [MIM:300100]
Q5TBB1	RNASEH2B	162	K	T	0.596348	0.380444	-0.215904	Aicardi-Goutieres syndrome type 2 (AGS2) [MIM:610181]
P01008	SERPINC1	461	P	L	0.632498	0.416646	-0.215852	Antithrombin-III deficiency (AT3D) [MIM:107300]
P52952	NKX2-5	25	R	C	0.656093	0.44098	-0.215113	Atrial septal defect with atrioventricular conduction defects (ASD-AVCD) [MIM:108900]; Congenital hypothyroidism non-goitrous type 5 (CHNG5) [MIM:225250]; Tetralogy of Fallot (TOF) [MIM:187500]
P04114	APOB	3527	R	Q	0.658255	0.443893	-0.214362	Familial ligand-defective apolipoprotein B-100 (FDB) [MIM:144010]
Q15772	SPEG	1903	R	W	0.674104	0.461276	-0.212828	An ovarian mucinous carcinoma sample
P78504	JAG1	163	P	L	0.563954	0.351815	-0.212138	Alagille syndrome type 1 (ALGS1) [MIM:118450]
P54802	NAGLU	516	P	L	0.54662	0.335447	-0.211174	Mucopolysaccharidosis type 3B (MPS3B) [MIM:252920]
P20807	CAPN3	4	V	I	0.634417	0.423512	-0.210905	Limb-girdle muscular dystrophy type 2A (LGMD2A) [MIM:253600]
Q96RR1	PEO1	319	K	E	0.549791	0.33947	-0.210321	Sensory ataxic neuropathy dysarthria and ophthalmoparesis (SANDO) [MIM:607459]
P43246	MSH2	723	S	F	0.539762	0.330207	-0.209555	Hereditary non-polyposis colorectal cancer type 1 (HNPCC1) [MIM:120435]
P49335	POU3F4	323	R	G	0.627224	0.417827	-0.209397	X-linked deafness type 3 (DFN3) [MIM:304400]
Q13510	ASAH1	36	Y	C	0.629524	0.420145	-0.209379	Farber disease (FD) [MIM:228000]
Q99519	NEU1	370	Y	C	0.658545	0.450828	-0.207717	Sialidosis [MIM:256550]
Q86UK0	ABCA12	1381	G	E	0.571568	0.364149	-0.207419	Ichthyosis lamellar type 2 (LI2) [MIM:601277]
P30613	PKLR	427	E	D	0.639428	0.432041	-0.207387	Pyruvate kinase deficiency of red cells (PKRD) [MIM:266200]
Q13023	AKAP6	1702	E	Q	0.524783	0.31773	-0.207053	A breast cancer sample
Q9H9Q4	NHEJ1	57	R	G	0.655888	0.45008	-0.205808	Severe combined immunodeficiency due to NHEJ1 deficiency (NHEJ1-SCID) [MIM:611291]
P49619	DGKG	706	E	K	0.570151	0.36502	-0.205131	A breast cancer sample
P07949	RET	883	A	F	0.571818	0.367037	-0.204781	Multiple neoplasia type 2B (MEN2B) [MIM:162300]
Q8IUG5	MYO18B	2381	R	H	0.516504	0.312176	-0.204328	Lung adenocarcinoma
P01241	GH1	100	E	K	0.517031	0.312849	-0.204181	Isolated growth hormone deficiency type IB (IGHD IB) [MIM:262400]
P19429	TNNI3	166	S	F	0.566827	0.363034	-0.203793	Cardiomyopathy familial hypertrophic type 7 (CMH7) [MIM:191044]
P25445	FAS	264	N	K	0.561928	0.358184	-0.203743	Non-Hodgkin lymphoma
P49815	TSC2	1227	P	L	0.696458	0.49436	-0.202098	Tuberous sclerosis complex (TSC) [MIM:191100]
O60733	PLA2G6	632	R	W	0.683024	0.480939	-0.202084	Karak syndrome [MIM:608395]
P04070	PROC	321	P	L	0.697005	0.495678	-0.201327	Protein C deficiency autosomal dominant (ADPROCD) [MIM:176860]
P30566	ADSL	422	D	Y	0.557732	0.357016	-0.200715	Adenylosuccinase deficiency (ADSL deficiency) [MIM:103050]
Q3T906	GNPTAB	1236	K	M	0.582085	0.381579	-0.200506	Mucolipidosis type II (MLII) [MIM:252500]
P52945	PDX1	197	R	H	0.614898	0.414588	-0.200311	Maturity onset diabetes of the young type 4 (MODY4) [MIM:606392]
Q13253	NOG	35	P	R	0.582702	0.382586	-0.200115	Symphalangism proximal syndrome (SYM1) [MIM:185800]; Tarsal-carpal coalition syndrome (TCC) [MIM:186570]
P19544	WT1	396	D	Y	0.612911	0.415864	-0.197046	Denys-Drash syndrome (DDS) [MIM:194080]
P02766	TTR	79	T	K	0.54578	0.349255	-0.196525	Amyloidosis type 1 (AMYL1) [MIM:176300]
P00966	ASS1	341	S	F	0.594651	0.398434	-0.196217	Citrullinemia type 1 (CTLN1) [MIM:215700]
Q04671	OCA2	10	R	W	0.66815	0.473073	-0.195077	Oculocutaneous albinism type 2 (OCA2) [MIM:203200]
P19971	TYMP	289	E	A	0.616627	0.421693	-0.194934	Mitochondrial neurogastrointestinal encephalomyopathy (MNGIE) [MIM:603041]
P42336	PIK3CA	542	E	V	0.64004	0.445602	-0.194438	Cancer
P30793	GCH1	241	R	W	0.6148	0.420844	-0.193957	Dystonia type 5 (DYT5) [MIM:128230]
Q16678	CYP1B1	232	G	R	0.581011	0.387361	-0.193651	Primary congenital glaucoma type 3A (GLC3A) [MIM:231300]; Primary open angle glaucoma (POAG) [MIM:137760]
P43246	MSH2	349	P	L	0.581238	0.388246	-0.192991	Hereditary non-polyposis colorectal cancer type 1 (HNPCC1) [MIM:120435]
P25445	FAS	260	D	V	0.655343	0.462535	-0.192808	Autoimmune lymphoproliferative syndrome type 1A (ALPS1A) [MIM:601859]
P04424	ASL	95	R	C	0.669416	0.476735	-0.192681	Arginosuccinicaciduria (ARGINSA) [MIM:207900]
P41181	AQP2	185	P	A	0.501877	0.309958	-0.191919	Diabetes insipidus nephrogenic autosomal (ANDI) [MIM:125800]
P33897	ABCD1	291	E	D	0.561373	0.369569	-0.191804	Adrenoleukodystrophy X-linked (X-ALD) [MIM:300100]
P00740	F9	169	S	C	0.580246	0.388781	-0.191464	Recessive X-linked hemophilia B (HEMB) [MIM:306900]
Q15459	SF3A1	511	R	W	0.559341	0.368102	-0.191239	A colorectal cancer sample
P00533	EGFR	747	L	F	0.630772	0.43976	-0.191012	Lung cancer [MIM:211980]
P06744	GPI	5	T	I	0.683177	0.492541	-0.190636	Hereditary nonspherocytic hemolytic anemia (HA) [MIM:172400]
P03951	F11	263	G	E	0.639708	0.449709	-0.189999	F11 deficiency [MIM:612416]
P07949	RET	762	E	Q	0.655786	0.465827	-0.189959	Hirschsprung disease (HSCR) [MIM:142623]
P15289	ARSA	190	Q	H	0.541787	0.353583	-0.188205	Leukodystrophy metachromatic (MLD) [MIM:250100]
P38398	BRCA1	1204	R	I	0.521543	0.333557	-0.187987	Breast cancer (BC) [MIM:113705, 114480]
P15918	RAG1	669	E	G	0.544169	0.356606	-0.187563	Omenn syndrome (OS) [MIM:603554]
Q86X53	ERICH1	365	L	F	0.521728	0.335087	-0.186641	A colorectal cancer sample
P35222	CTNNB1	33	S	L	0.509894	0.325496	-0.184398	Hepatocellular carcinoma
P05166	PCCB	168	E	K	0.666624	0.4829	-0.183724	Propionic acidemia type II (PA-2) [MIM:606054]
P15289	ARSA	426	P	L	0.505118	0.321863	-0.183255	Leukodystrophy metachromatic (MLD) [MIM:250100]
P08603	CFH	78	R	G	0.575491	0.392543	-0.182948	Hemolytic-uremic syndrome (HUS) [MIM:235400]
O43933	PEX1	593	G	R	0.522618	0.340819	-0.181799	Peroxisome biogenesis disorder complementation group 1 (PBD-CG1) [MIM:602136]
P30968	GNRHR	262	R	Q	0.576387	0.395811	-0.180575	Idiopathic hypogonadotropic hypogonadism (IHH) [MIM:146110]
A3KN83	SBNO1	997	S	C	0.585493	0.405737	-0.179756	A breast cancer sample
P17661	DES	460	S	I	0.651871	0.472206	-0.179665	Desmin-related cardio-skeletal myopathy (CSM) [MIM:601419]
Q6P3W7	SCYL2	863	Q	H	0.542446	0.363137	-0.179309	A lung adenocarcinoma sample
P35548	MSX2	172	R	H	0.542908	0.367969	-0.17494	Parietal foramina 1 (PFM1) [MIM:168500]
P49675	STAR	217	R	T	0.520668	0.346571	-0.174097	Congenital lipoid adrenal hyperplasia (CLAH) [MIM:201710]
Q13813	SPTAN1	904	S	C	0.585832	0.412402	-0.17343	A breast cancer sample
P40337	VHL	166	V	F	0.567414	0.394876	-0.172538	Von Hippel-Lindau disease (VHLD) [MIM:193300]
P35475	IDUA	423	S	R	0.539843	0.36795	-0.171893	Mucopolysaccharidosis type 1S (MPS1S) [MIM:607016]
P30613	PKLR	421	Q	K	0.665931	0.494167	-0.171764	Pyruvate kinase deficiency of red cells (PKRD) [MIM:266200]
O95382	MAP3K6	869	P	T	0.53655	0.366596	-0.169954	A breast cancer sample
O15118	NPC1	727	V	F	0.525123	0.355426	-0.169697	Niemann-Pick disease type C1 (NPC1) [MIM:257220]
O15075	DCLK1	29	G	C	0.664369	0.494716	-0.169654	A gastric adenocarcinoma sample
P37058	HSD17B3	80	R	Q	0.586857	0.418906	-0.167951	Male pseudohermaphrodism with gynecomastia (MPH) [MIM:264300]
P51810	GPR143	5	R	C	0.585749	0.418622	-0.167127	Ocular albinism type 1 (OA1) [MIM:300500]
P04275	VWF	2362	C	F	0.583704	0.416663	-0.16704	Various forms of von Willebrand disease (VWD) [MIM:193400, 277480]
Q9H3D4	TP63	343	R	W	0.608378	0.443114	-0.165264	Ectrodactyly-ectodermal dysplasia-cleft lip/palate syndrome type 3 (EEC3) [MIM:604292]
Q9H251	CDH23	247	E	K	0.614015	0.449619	-0.164396	Usher syndrome type 1D (USH1D) [MIM:601067]
P22304	IDS	468	R	L	0.634746	0.470759	-0.163987	Mucopolysaccharidosis type 2 (MPS2) [MIM:309900]
P00441	SOD1	94	G	R	0.611719	0.448329	-0.163389	Amyotrophic lateral sclerosis type 1 (ALS1) [MIM:105400]
P08236	GUSB	611	R	W	0.618387	0.455009	-0.163379	Mucopolysaccharidosis type 7 (MPS7) [MIM:253220]
Q5T4S7	UBR4	1394	R	H	0.566531	0.404336	-0.162195	A breast cancer sample
Q8IV35	WDR49	10	R	H	0.644314	0.482319	-0.161995	A colorectal cancer sample
O43678	NDUFA2	50	D	N	0.633036	0.472263	-0.160773	A breast cancer sample
P09417	QDPR	150	Y	C	0.556036	0.395367	-0.160669	BH4-deficient hyperphenylalaninemia type C (HPABH4C) [MIM:261630]
Q92838	EDA	255	G	D	0.619673	0.459357	-0.160316	Ectodermal dysplasia, type 1 (ED1) [MIM:305100]
P42336	PIK3CA	542	E	Q	0.64004	0.479998	-0.160042	Cancer
Q9BX63	BRIP1	647	W	C	0.520063	0.360048	-0.160016	Fanconi anemia complementation group J (FANCJ) [MIM:609054, 227650]
P30613	PKLR	342	I	F	0.602938	0.443002	-0.159936	Pyruvate kinase deficiency of red cells (PKRD) [MIM:266200]
P32004	L1CAM	309	E	K	0.591906	0.432353	-0.159553	Mental retardation-aphasia-shuffling gait-adducted thumbs syndrome (MASA) [MIM:303350]
Q13402	MYO7A	1887	P	L	0.651965	0.492753	-0.159212	Usher syndrome type 1B (USH1B) [MIM:276900]
Q16586	SGCA	98	R	C	0.571543	0.413301	-0.158243	Limb-girdle muscular dystrophy type 2D (LGMD2D) [MIM:608099]
Q14126	DSG2	812	G	C	0.552874	0.395518	-0.157356	Familial arrhythmogenic right ventricular dysplasia 10 (ARVD10) [MIM:610193]
Q96SI9	STRBP	280	G	R	0.525093	0.367962	-0.157131	A breast cancer sample
Q04656	ATP7A	844	R	H	0.575316	0.419218	-0.156099	Menkes disease (MNKD) [MIM:309400]
Q9GZX3	CHST6	203	D	E	0.589786	0.434106	-0.15568	Macular corneal dystrophy (MCD) [MIM:217800]
P05186	ALPL	298	E	K	0.542374	0.387657	-0.154717	Hypophosphatasia adult type (hypophosphatasia) [MIM:146300]; Hypophosphatasia childhood (hypophosphatasia) [MIM:241510]; Hypophosphatasia infantile (hypophosphatasia) [MIM:241500]
P33897	ABCD1	556	Q	R	0.522565	0.36798	-0.154585	Adrenoleukodystrophy X-linked (X-ALD) [MIM:300100]
P48436	SOX9	165	H	Y	0.637712	0.484237	-0.153475	Campomelic dysplasia (CMD1) [MIM:114290]
Q16678	CYP1B1	229	E	K	0.639599	0.487593	-0.152006	Primary congenital glaucoma type 3A (GLC3A) [MIM:231300]; Primary open angle glaucoma (POAG) [MIM:137760]
P52952	NKX2-5	77	P	L	0.639932	0.489566	-0.150366	Atrial septal defect with atrioventricular conduction defects (ASD-AVCD) [MIM:108900]
Q16518	RPE65	91	R	W	0.6201	0.469872	-0.150228	Retinitis pigmentosa type 20 (RP20) [MIM:180069]
P08686	CYP21A2	483	R	W	0.519783	0.369639	-0.150145	Adrenal hyperplasia type 3 (AH3) [MIM:201910]
O15305	PMM2	132	I	F	0.519313	0.369346	-0.149967	Congenital disorder of glycosylation type 1A (CDG1A) [MIM:212065]
P55157	MTTP	780	N	Y	0.549995	0.400286	-0.149709	Abetalipoproteinemia (ABL) [MIM:200100]
P30613	PKLR	376	S	I	0.606386	0.456878	-0.149509	Pyruvate kinase deficiency of red cells (PKRD) [MIM:266200]
Q9H4B6	SAV1	185	A	D	0.638209	0.488978	-0.149231	A colon cancer cell line
Q9H2C0	GAN	486	E	K	0.579338	0.431836	-0.147502	Giant axonal neuropathy (GAN) [MIM:256850]
O75445	USH2A	3124	R	G	0.570339	0.422884	-0.147455	Usher syndrome type 2A (USH2A) [MIM:276901]
P21817	RYR1	178	Y	C	0.576761	0.429386	-0.147375	Malignant hyperthermia susceptibility type 1 (MHS1) [MIM:145600]
P34059	GALNS	61	R	W	0.554422	0.409015	-0.145406	Mucopolysaccharidosis type 4A (MPS4A) [MIM:253000]
P00441	SOD1	126	D	H	0.578985	0.433962	-0.145023	Amyotrophic lateral sclerosis type 1 (ALS1) [MIM:105400]
P04150	NR3C1	753	L	F	0.559352	0.414836	-0.144516	Two glucocorticoid resistant leukemia cell lines lacking the normal allele
Q9UBP0	SPAST	424	R	G	0.577136	0.432828	-0.144308	Spastic paraplegia autosomal dominant type 4 (SPG4) [MIM:182601]
Q13315	ATM	2227	R	C	0.564425	0.422102	-0.142322	Ataxia telangiectasia (AT) [MIM:208900]
P43246	MSH2	13	S	I	0.623226	0.480981	-0.142246	Colorectal cancer
P13569	CFTR	111	P	L	0.554944	0.412873	-0.142071	Congenital bilateral absence of the vas deferens (CBAVD) [MIM:277180]
P30613	PKLR	498	R	H	0.529089	0.387417	-0.141672	Pyruvate kinase deficiency of red cells (PKRD) [MIM:266200]
P21817	RYR1	401	R	H	0.623366	0.48295	-0.140416	Malignant hyperthermia susceptibility type 1 (MHS1) [MIM:145600]
Q9UPN3	MACF1	302	E	V	0.56694	0.426931	-0.140009	A breast cancer sample
P35222	CTNNB1	34	G	E	0.604889	0.465179	-0.13971	Pilomatrixoma (PTR) [MIM:132600]
P04062	GBA	87	R	W	0.515502	0.376243	-0.139259	Gaucher disease (GD) [MIM:230800]
P98161	PKD1	3039	R	C	0.515159	0.376002	-0.139157	Polycystic kidney disease autosomal dominant type 1 (ADPKD1) [MIM:173900]
O15305	PMM2	237	T	M	0.552076	0.413273	-0.138803	Congenital disorder of glycosylation type 1A (CDG1A) [MIM:212065]
Q13247	SFRS6	145	R	Q	0.587048	0.448965	-0.138083	A colorectal cancer sample
Q8IUG5	MYO18B	2295	G	C	0.528829	0.390787	-0.138042	Lung small cell carcinoma
P78504	JAG1	163	P	R	0.563954	0.426446	-0.137507	Alagille syndrome type 1 (ALGS1) [MIM:118450]
Q13253	NOG	35	P	A	0.582702	0.445599	-0.137103	Brachydactyly type B2 (BDB2) [MIM:611377]
P35520	CBS	125	R	W	0.63298	0.495977	-0.137003	Cystathionine beta-synthase deficiency (CBSD) [MIM:236200]
Q03426	MVK	150	S	L	0.515934	0.37941	-0.136524	Hyperimmunoglobulinemia D and periodic fever syndrome (HIDS) [MIM:260920]
P00740	F9	79	E	D	0.560928	0.424647	-0.13628	Recessive X-linked hemophilia B (HEMB) [MIM:306900]
Q9BXB4	OSBPL11	184	S	L	0.630648	0.494432	-0.136216	A breast cancer sample
O75445	USH2A	3504	P	T	0.563425	0.429736	-0.133689	Usher syndrome type 2A (USH2A) [MIM:276901]
Q99972	MYOC	246	G	R	0.557567	0.423978	-0.133589	Primary open angle glaucoma type 1A (GLC1A) [MIM:137750]
Q8TCZ9	PKHD1	19	R	H	0.508874	0.375367	-0.133507	A colorectal cancer sample
P50851	LRBA	2038	Q	H	0.577316	0.443815	-0.133502	A breast cancer sample
P35222	CTNNB1	34	G	R	0.604889	0.472155	-0.132734	Hepatocellular carcinoma
O60880	SH2D1A	28	S	R	0.50729	0.375565	-0.131724	Lymphoproliferative syndrome X-linked type 1 (XLP1) [MIM:308240]
Q8TCZ9	PKHD1	1486	P	L	0.627788	0.496353	-0.131434	Polycystic kidney disease autosomal recessive (ARPKD) [MIM:263200]
Q13402	MYO7A	241	R	S	0.550879	0.420543	-0.130336	Usher syndrome type 1B (USH1B) [MIM:276900]
P04062	GBA	234	G	W	0.559069	0.430056	-0.129013	Gaucher disease (GD) [MIM:230800]
Q9UMF0	ICAM5	488	E	Q	0.501844	0.373912	-0.127932	A breast cancer sample
Q02094	RHAG	380	G	V	0.516462	0.389841	-0.126621	Regulator type Rh-null hemolytic anemia (RHN) [MIM:268150]
P40692	MLH1	35	M	K	0.550289	0.424014	-0.126274	Hereditary non-polyposis colorectal cancer type 2 (HNPCC2) [MIM:609310]
Q02388	COL7A1	2791	R	W	0.52115	0.395255	-0.125895	Epidermolysis bullosa dystrophica (DEB) [MIM:131750, 226600]
P46100	ATRX	2035	D	V	0.541557	0.415841	-0.125717	X-linked alpha-thalassemia/mental retardation syndrome (ATR-X) [MIM:301040]
P00966	ASS1	310	K	Q	0.51055	0.38501	-0.12554	Citrullinemia type 1 (CTLN1) [MIM:215700]
Q96PU8	QKI	336	R	Q	0.601778	0.476304	-0.125474	A colorectal cancer sample
Q96RG2	PASK	11	E	K	0.592866	0.468387	-0.124479	A metastatic melanoma sample
P35520	CBS	369	R	H	0.529719	0.405848	-0.123871	Cystathionine beta-synthase deficiency (CBSD) [MIM:236200]
P25054	APC	911	E	G	0.599335	0.476021	-0.123314	Familial adenomatous polyposis (FAP) [MIM:175100]
P11310	ACADM	121	T	I	0.593217	0.470049	-0.123168	Medium-chain acyl-CoA dehydrogenase deficiency (MCAD deficiency) [MIM:201450]
Q06124	PTPN11	505	R	K	0.596961	0.474774	-0.122187	Noonan syndrome 1 (NS1) [MIM:163950]
O75161	NPHP4	776	P	R	0.553227	0.431185	-0.122042	Nephronophthisis type 4 (NPHP4) [MIM:606966]
Q9UNE0	EDAR	420	R	Q	0.519867	0.399625	-0.120242	Ectodermal dysplasia type 3 (ED3) [MIM:129490]
Q9Y4R7	TTLL3	476	M	I	0.590549	0.470894	-0.119655	A colorectal cancer sample
P51687	SUOX	268	R	Q	0.582532	0.463534	-0.118999	Isolated sulfite oxidase deficiency (ISOD) [MIM:272300]
P15289	ARSA	425	P	T	0.551109	0.432223	-0.118886	Leukodystrophy metachromatic (MLD) [MIM:250100]
P07902	GALT	229	K	N	0.615405	0.496583	-0.118823	Galactosemia [MIM:230400]
P40337	VHL	65	S	W	0.528185	0.411067	-0.117118	Von Hippel-Lindau disease (VHLD) [MIM:193300]
Q07889	SOS1	552	R	K	0.563804	0.447031	-0.116773	Noonan syndrome type 4 (NS4) [MIM:610733]
P06400	RB1	803	N	K	0.585716	0.469265	-0.116451	Childhood cancer retinoblastoma (RB) [MIM:180200]
P11047	LAMC1	1116	R	H	0.592558	0.476714	-0.115844	A colorectal cancer sample
P06280	GLA	361	G	R	0.566592	0.450854	-0.115738	Fabry disease (FD) [MIM:301500]
P45379	TNNT2	102	R	L	0.606379	0.494025	-0.112354	Cardiomyopathy familial hypertrophic type 2 (CMH2) [MIM:115195]
O14896	IRF6	6	R	C	0.511182	0.399118	-0.112064	Van der Woude syndrome (VWS) [MIM:119300]
Q6ZUT3	FRMD7	340	S	L	0.505149	0.393577	-0.111571	X-linked congenital nystagmus 1 (NYS1) [MIM:310700]
Q8N4F0	BPIL1	20	A	V	0.564798	0.453464	-0.111334	A colorectal cancer sample
P10253	GAA	437	R	C	0.526142	0.415834	-0.110308	Glycogen storage disease type 2 (GSD2) [MIM:232300]
P05186	ALPL	426	G	D	0.541299	0.431199	-0.1101	Hypophosphatasia adult type (hypophosphatasia) [MIM:146300]; Hypophosphatasia childhood (hypophosphatasia) [MIM:241510]; Hypophosphatasia infantile (hypophosphatasia) [MIM:241500]
P49815	TSC2	1295	D	V	0.550781	0.441459	-0.109322	Tuberous sclerosis complex (TSC) [MIM:191100]
Q8WZ42	TTN	19392	E	K	0.528148	0.41939	-0.108758	A lung neuroendocrine carcinoma sample
Q99972	MYOC	352	E	K	0.587202	0.47944	-0.107762	Primary open angle glaucoma type 1A (GLC1A) [MIM:137750]
Q02388	COL7A1	2623	G	C	0.55992	0.454147	-0.105773	Epidermolysis bullosa dystrophica pretibial type (PR-DEB) [MIM:131850]
P00441	SOD1	125	D	V	0.51909	0.413651	-0.105439	Amyotrophic lateral sclerosis type 1 (ALS1) [MIM:105400]
P45379	TNNT2	104	R	L	0.581801	0.476839	-0.104962	Cardiomyopathy familial hypertrophic type 2 (CMH2) [MIM:115195]
P35557	GCK	279	E	Q	0.530132	0.425929	-0.104203	Maturity onset diabetes of the young type 2 (MODY2) [MIM:125851]
Q59H18	TNNI3K	531	S	L	0.521554	0.418518	-0.103036	A colorectal adenocarcinoma sample
Q9UEF7	KL	954	P	L	0.516455	0.413826	-0.10263	A colorectal cancer sample
P05165	PCCA	343	D	G	0.512336	0.409813	-0.102522	Propionic acidemia type I (PA-1) [MIM:606054]
P48634	BAT2	1152	R	H	0.530614	0.429208	-0.101405	A breast cancer sample
O14654	IRS4	20	A	V	0.53088	0.429506	-0.101374	A colorectal cancer sample
O95990	FAM107A	19	P	L	0.56763	0.468051	-0.0995791	Renal cell carcinoma cell line
Q14739	LBR	119	P	L	0.537178	0.438383	-0.0987949	Pelger-Huet anomaly (PHA) [MIM:169400]
Q7Z333	SETX	274	M	I	0.517247	0.419076	-0.0981708	Spinocerebellar ataxia autosomal recessive type 1 (SCAR1) [MIM:606002]
Q8WZ42	TTN	25859	E	K	0.535977	0.439925	-0.0960519	A metastatic melanoma sample
P00740	F9	170	C	F	0.56709	0.471775	-0.095315	Recessive X-linked hemophilia B (HEMB) [MIM:306900]
P30793	GCH1	184	R	H	0.510712	0.417179	-0.0935331	GTP cyclohydrolase 1 deficiency (GCH1D) [MIM:233910]
Q99959	PKP2	654	K	Q	0.508232	0.415672	-0.09256	Familial arrhythmogenic right ventricular dysplasia 9 (ARVD9) [MIM:609040]
O60832	DKC1	2	A	V	0.584278	0.491765	-0.0925133	Dyskeratosis congenita X-linked recessive (XDKC) [MIM:305000]
P09417	QDPR	149	G	R	0.562272	0.472363	-0.0899091	BH4-deficient hyperphenylalaninemia type C (HPABH4C) [MIM:261630]
P54802	NAGLU	455	Y	C	0.541326	0.453596	-0.0877301	Mucopolysaccharidosis type 3B (MPS3B) [MIM:252920]
Q16678	CYP1B1	530	D	G	0.557219	0.470554	-0.0866653	Primary open angle glaucoma (POAG) [MIM:137760]
P08514	ITGA2B	412	G	R	0.529599	0.444277	-0.0853225	Glanzmann thrombasthenia (GT) [MIM:273800]
P04275	VWF	2546	N	Y	0.572056	0.486823	-0.0852333	Various forms of von Willebrand disease (VWD) [MIM:193400, 277480]
P07949	RET	287	R	Q	0.542497	0.457347	-0.0851503	Hirschsprung disease (HSCR) [MIM:142623]
P55157	MTTP	590	S	I	0.521438	0.43783	-0.0836078	Abetalipoproteinemia (ABL) [MIM:200100]
Q8TB52	FBXO30	8	S	C	0.504523	0.423165	-0.081358	A colorectal cancer sample
P48637	GSS	26	A	D	0.556649	0.475581	-0.0810683	Glutathione synthetase deficiency (GSS deficiency) [MIM:266130]
P16871	IL7R	66	T	I	0.508138	0.427294	-0.0808439	Autosomal recessive severe combined immunodeficiency T-cell-negative/B-cell-positive/NK cell-positive (T(-)/B(+)/NK(+) SCID) [MIM:608971]
O95292	VAPB	56	P	S	0.54583	0.464993	-0.0808364	Amyotrophic lateral sclerosis type 8 (ALS8) [MIM:608627]; Spinal muscular atrophy autosomal dominant Finkel type (SMAF) [MIM:182980]
P00480	OTC	320	R	L	0.530481	0.451936	-0.0785448	Ornithine carbamoyltransferase deficiency (OTCD) [MIM:311250]
Q8WZ42	TTN	23303	H	Y	0.56213	0.483659	-0.0784713	A metastatic melanoma sample
P35575	G6PC	5	M	R	0.562095	0.48517	-0.0769251	Glycogen storage disease type 1A (GSD1A) [MIM:232200]
P51648	ALDH3A2	328	M	I	0.550049	0.473207	-0.0768414	Sjoegren-Larsson syndrome (SLS) [MIM:270200]
Q969M1	TOMM40L	100	D	N	0.519847	0.444264	-0.075583	A colorectal cancer sample
P46100	ATRX	1552	V	F	0.50291	0.427365	-0.0755453	X-linked alpha-thalassemia/mental retardation syndrome (ATR-X) [MIM:301040]
P25189	MPZ	224	D	Y	0.505892	0.432367	-0.0735246	Charcot-Marie-Tooth disease type 1B (CMT1B) [MIM:118200]
Q13315	ATM	2063	G	E	0.552374	0.479324	-0.0730499	Ataxia telangiectasia (AT) [MIM:208900]
P08236	GUSB	52	S	F	0.538825	0.466176	-0.0726495	Mucopolysaccharidosis type 7 (MPS7) [MIM:253220]
Q8IUG5	MYO18B	389	W	C	0.553813	0.481569	-0.0722436	Lung adenocarcinoma
P33897	ABCD1	298	G	D	0.542615	0.471446	-0.071169	Adrenoleukodystrophy X-linked (X-ALD) [MIM:300100]
P15313	ATP6V1B1	174	M	R	0.506362	0.435562	-0.0707996	Distal renal tubular acidosis with deafness (dRTA) [MIM:267300]
Q99574	SERPINI1	52	S	R	0.539644	0.469852	-0.0697922	Familial encephalopathy with neuroserpin inclusion bodies (FEN1B) [MIM:604218]
Q99972	MYOC	245	C	Y	0.540111	0.471697	-0.0684139	Primary open angle glaucoma type 1A (GLC1A) [MIM:137750]
P98172	EFNB1	158	M	I	0.560332	0.492662	-0.0676707	Craniofrontonasal syndrome (CFNS) [MIM:304110]
O14795	UNC13B	209	P	S	0.532879	0.465453	-0.0674257	A colorectal cancer sample
Q06187	BTK	64	V	F	0.502949	0.435711	-0.0672383	X-linked agammaglobulinemia (XLA) [MIM:300755]
P10828	THRB	316	R	H	0.506826	0.439764	-0.0670622	Selective pituitary thyroid hormone resistance (PRTH) [MIM:145650]
Q59H18	TNNI3K	899	M	I	0.51884	0.451796	-0.067044	A head & Neck squamous cell carcinoma sample
P00441	SOD1	125	D	G	0.51909	0.452607	-0.0664831	Amyotrophic lateral sclerosis type 1 (ALS1) [MIM:105400]
Q99972	MYOC	244	G	V	0.55051	0.485354	-0.0651564	Primary open angle glaucoma type 1A (GLC1A) [MIM:137750]
P19438	TNFRSF1A	81	C	F	0.539052	0.47488	-0.0641721	Familial hibernian fever (FHF) [MIM:142680]
P00966	ASS1	191	E	Q	0.556272	0.493094	-0.0631782	Citrullinemia type 1 (CTLN1) [MIM:215700]
P23508	MCC	698	A	V	0.54906	0.486002	-0.0630581	Colorectal cancer
Q06187	BTK	613	G	D	0.537413	0.475914	-0.0614986	X-linked agammaglobulinemia (XLA) [MIM:300755]
P41235	HNF4A	402	V	I	0.515707	0.456104	-0.059603	Maturity onset diabetes of the young type 1 (MODY1) [MIM:125850]
O15305	PMM2	238	R	G	0.529381	0.469831	-0.0595494	Congenital disorder of glycosylation type 1A (CDG1A) [MIM:212065]
P21817	RYR1	4906	A	V	0.515579	0.457319	-0.0582593	Central core disease of muscle (CCD) [MIM:117000]
P16144	ITGB4	931	G	D	0.514672	0.456665	-0.058007	Generalized atrophic benign epidermolysis bullosa (GABEB) [MIM:226650]
Q6ZVD7	STOX1	825	N	I	0.537593	0.480803	-0.0567904	Pre-eclampsia/eclampsia 4 (PEE4) [MIM:609404]
Q96RR1	PEO1	335	P	L	0.53503	0.478301	-0.056729	Progressive external ophthalmoplegia with mitochondrial DNA deletions autosomal dominant type 3 (PEOA3) [MIM:609286]
P17661	DES	342	N	D	0.513947	0.458222	-0.0557245	Desmin-related cardio-skeletal myopathy (CSM) [MIM:601419]
Q0D2K0	NIPAL4	142	G	V	0.531605	0.476374	-0.0552307	Ichthyosis congenital autosomal recessive ichthyin-related (ARCII) [MIM:612281]
Q9ULD2	MTUS1	873	N	H	0.546619	0.491993	-0.0546262	Hepatocellular carcinoma (HCC) [MIM:114550]
Q6P5W5	SLC39A4	106	N	K	0.54101	0.486473	-0.054537	Acrodermatitis enteropathica zinc-deficiency type (AEZ) [MIM:201100]
P08397	HMBS	212	M	V	0.501472	0.449072	-0.0524006	Acute intermittent porphyria (AIP) [MIM:176000]
P31513	FMO3	492	R	W	0.51232	0.46049	-0.0518303	Trimethylaminuria (TMAU) [MIM:602079]
P23415	GLRA1	304	K	E	0.520628	0.469484	-0.0511433	Startle disease (STHE) [MIM:149400]
O15537	RS1	74	G	V	0.539085	0.488402	-0.0506829	X-linked juvenile retinoschisis 1 (XLRS1) [MIM:312700]
Q06187	BTK	607	A	D	0.520829	0.471364	-0.0494652	X-linked agammaglobulinemia (XLA) [MIM:300755]
P10253	GAA	191	Y	C	0.53958	0.490943	-0.0486366	Glycogen storage disease type 2 (GSD2) [MIM:232300]
P43246	MSH2	729	M	V	0.547409	0.498999	-0.0484106	Hereditary non-polyposis colorectal cancer type 1 (HNPCC1) [MIM:120435]
P40337	VHL	65	S	L	0.528185	0.480377	-0.0478082	Von Hippel-Lindau disease (VHLD) [MIM:193300]
Q32MZ4	LRRFIP1	68	S	C	0.528346	0.481456	-0.0468896	A breast cancer sample
Q8N1I0	DOCK4	87	T	I	0.539776	0.493193	-0.0465831	A CNS cancer cell line
Q8IVH4	MMAA	145	R	Q	0.528182	0.482528	-0.0456537	Methylmalonic aciduria type cblA (MMAA) [MIM:251100]
Q03468	ERCC6	1042	P	L	0.504318	0.460627	-0.0436908	Cockayne syndrome type B (CSB) [MIM:133540]
P04424	ASL	186	R	Q	0.531446	0.488089	-0.0433571	Arginosuccinicaciduria (ARGINSA) [MIM:207900]
O15360	FANCA	252	D	G	0.528334	0.485975	-0.0423595	Fanconi anemia (FA) [MIM:227650]
P03951	F11	266	S	N	0.535995	0.494331	-0.0416644	F11 deficiency [MIM:612416]
Q8NEV4	MYO3A	1347	D	H	0.501834	0.461525	-0.0403085	A renal clear cell carcinoma sample
Q99502	EYA1	429	D	G	0.522798	0.483028	-0.0397699	Branchiootorenal syndrome type 1 (BOR1) [MIM:113650]
Q6XLA1	CASC2	8	P	S	0.505375	0.467591	-0.0377844	Some patients with endometrial cancer
P00492	HPRT1	50	A	V	0.504936	0.473216	-0.0317198	Lesch-Nyhan syndrome (LNS) [MIM:300322]
Q9H251	CDH23	2517	S	G	0.506828	0.476249	-0.030579	Usher syndrome type 1D (USH1D) [MIM:601067]
P40692	MLH1	21	A	V	0.511021	0.481091	-0.0299301	Hereditary non-polyposis colorectal cancer type 2 (HNPCC2) [MIM:609310]
P51570	GALK1	44	H	Y	0.509877	0.482376	-0.0275011	Galactosemia II [MIM:230200]
O14745	SLC9A3R1	225	E	K	0.516831	0.491285	-0.0255466	Hypophosphatemic nephrolithiasis/osteoporosis type 2 (NPHLOP2) [MIM:612287]
P00492	HPRT1	168	T	I	0.502119	0.477733	-0.0243853	Gout [MIM:300323]
P68133	ACTA1	271	M	R	0.504092	0.480458	-0.0236337	Nemaline myopathy type 3 (NEM3) [MIM:161800]
P19438	TNFRSF1A	115	S	G	0.520053	0.496432	-0.0236203	Familial hibernian fever (FHF) [MIM:142680]
P30793	GCH1	191	V	I	0.518475	0.495135	-0.0233406	Dystonia type 5 (DYT5) [MIM:128230]
P51587	BRCA2	222	P	S	0.518958	0.497401	-0.0215568	Breast cancer (BC) [MIM:612555, 114480]
Q16586	SGCA	196	V	I	0.50908	0.48808	-0.0210007	Limb-girdle muscular dystrophy type 2D (LGMD2D) [MIM:608099]
Q99972	MYOC	353	T	I	0.5036	0.48297	-0.0206304	Primary open angle glaucoma type 1A (GLC1A) [MIM:137750]
O15078	CEP290	7	W	C	0.504985	0.484497	-0.0204882	Joubert syndrome type 5 (JBTS5) [MIM:610188]
Q9UBP0	SPAST	423	V	L	0.506391	0.489941	-0.01645	A breast cancer sample
P00966	ASS1	310	K	R	0.51055	0.497018	-0.0135322	Citrullinemia type 1 (CTLN1) [MIM:215700]
